# Supplementary material for: A Plant-Specific TGS1 Homolog Influences Gametophyte Development in Sexual Tetraploid Paspalum notatum Ovules
Source: PubMed Central journal article supplement (PMC6895069; doi:10.3389/fpls.2019.01566), 2019-11-29

### Supplementary Data Sheet 3

Adjacent focal planes of the antisense plants' ovules shown in Figure 2E-F and ovules of sexual and apomictic controls

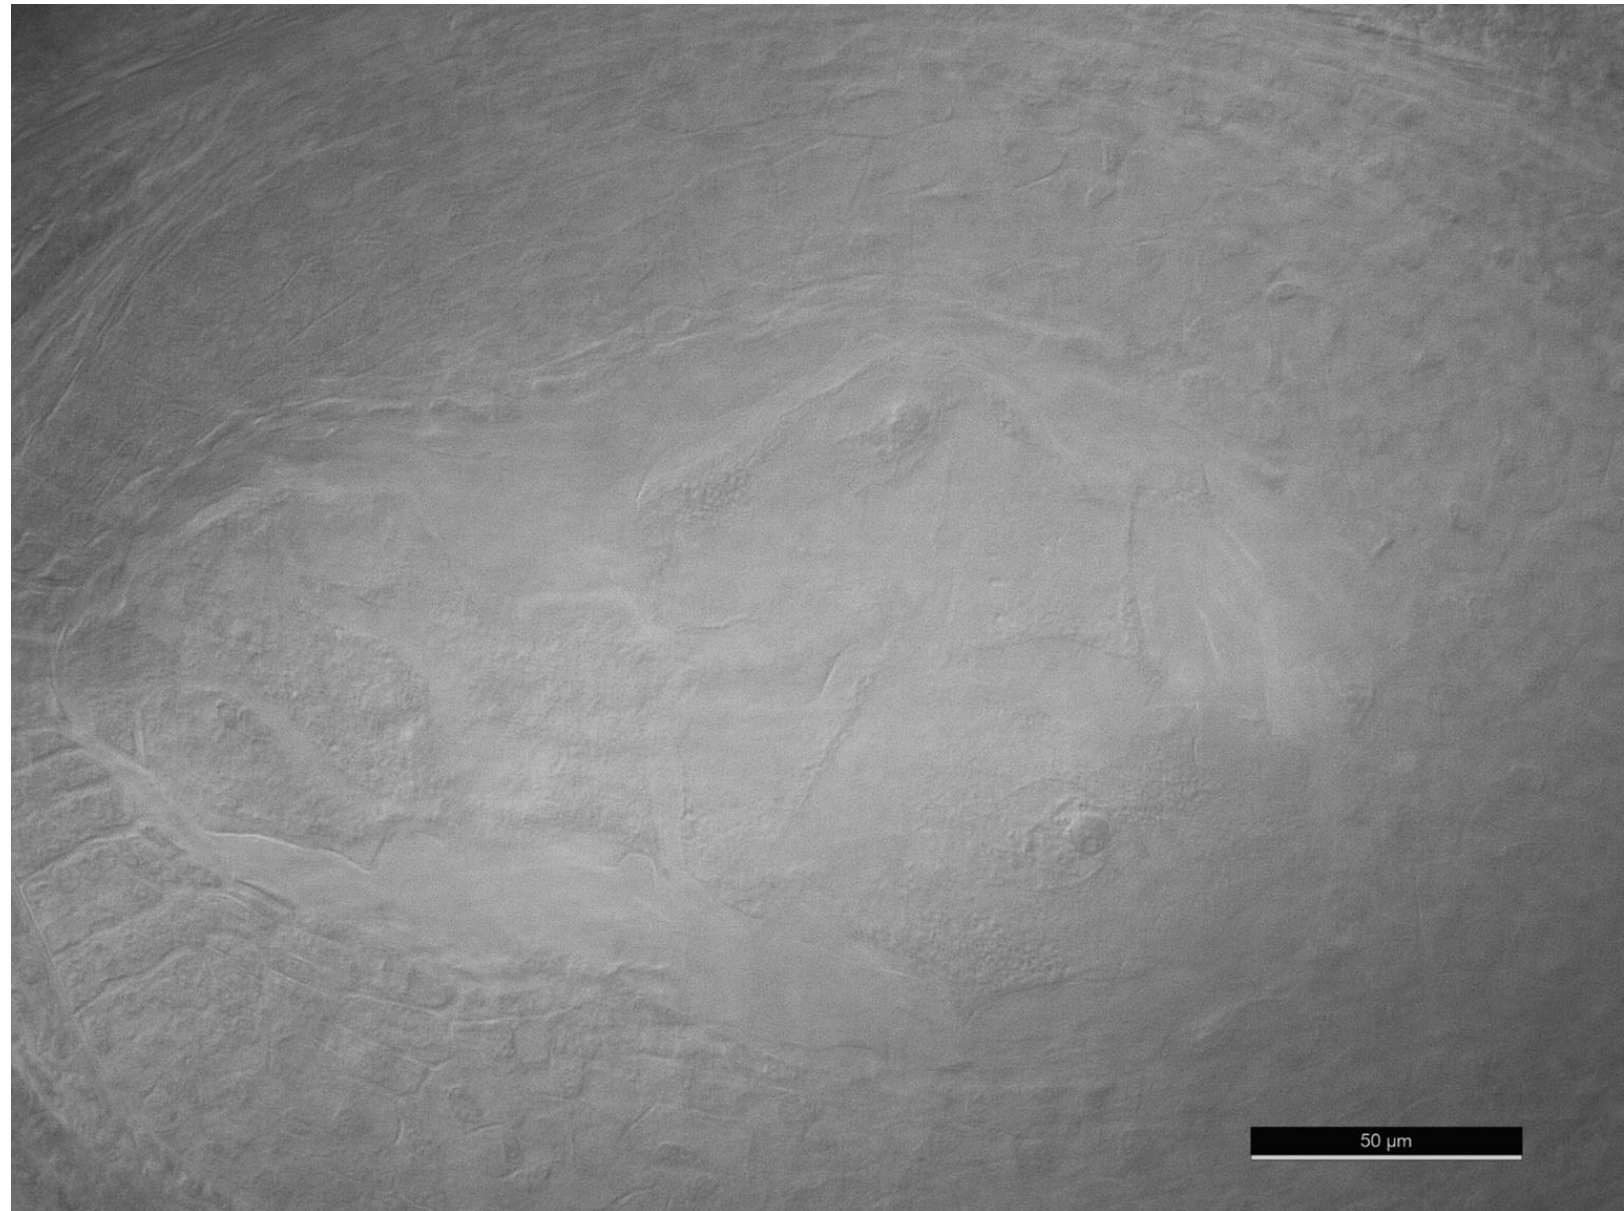

**Fig. 2E ovule, antisense plant E2.9,  
focal plane 1**

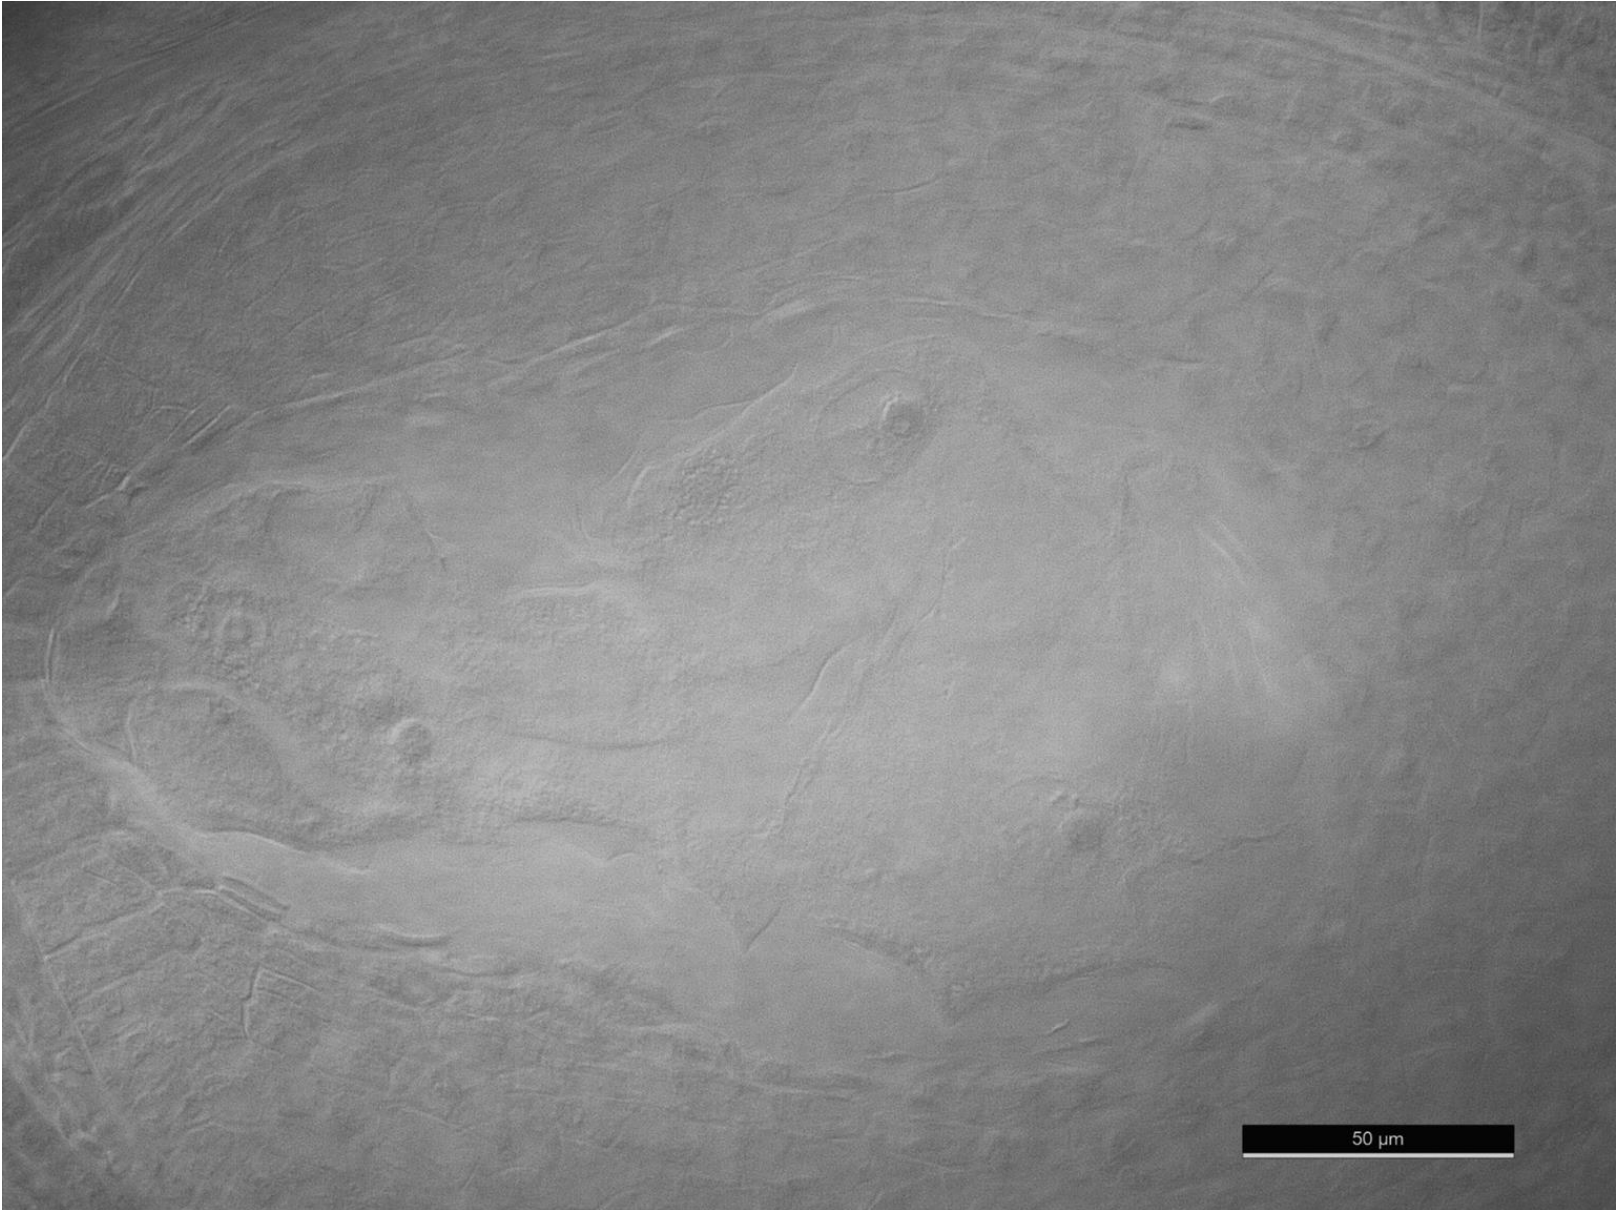

**Fig. 2E ovule, antisense plant E2.9,  
focal plane 2**

**Fig. 2E ovule, antisense plant E2.9,  
focal plane 3**

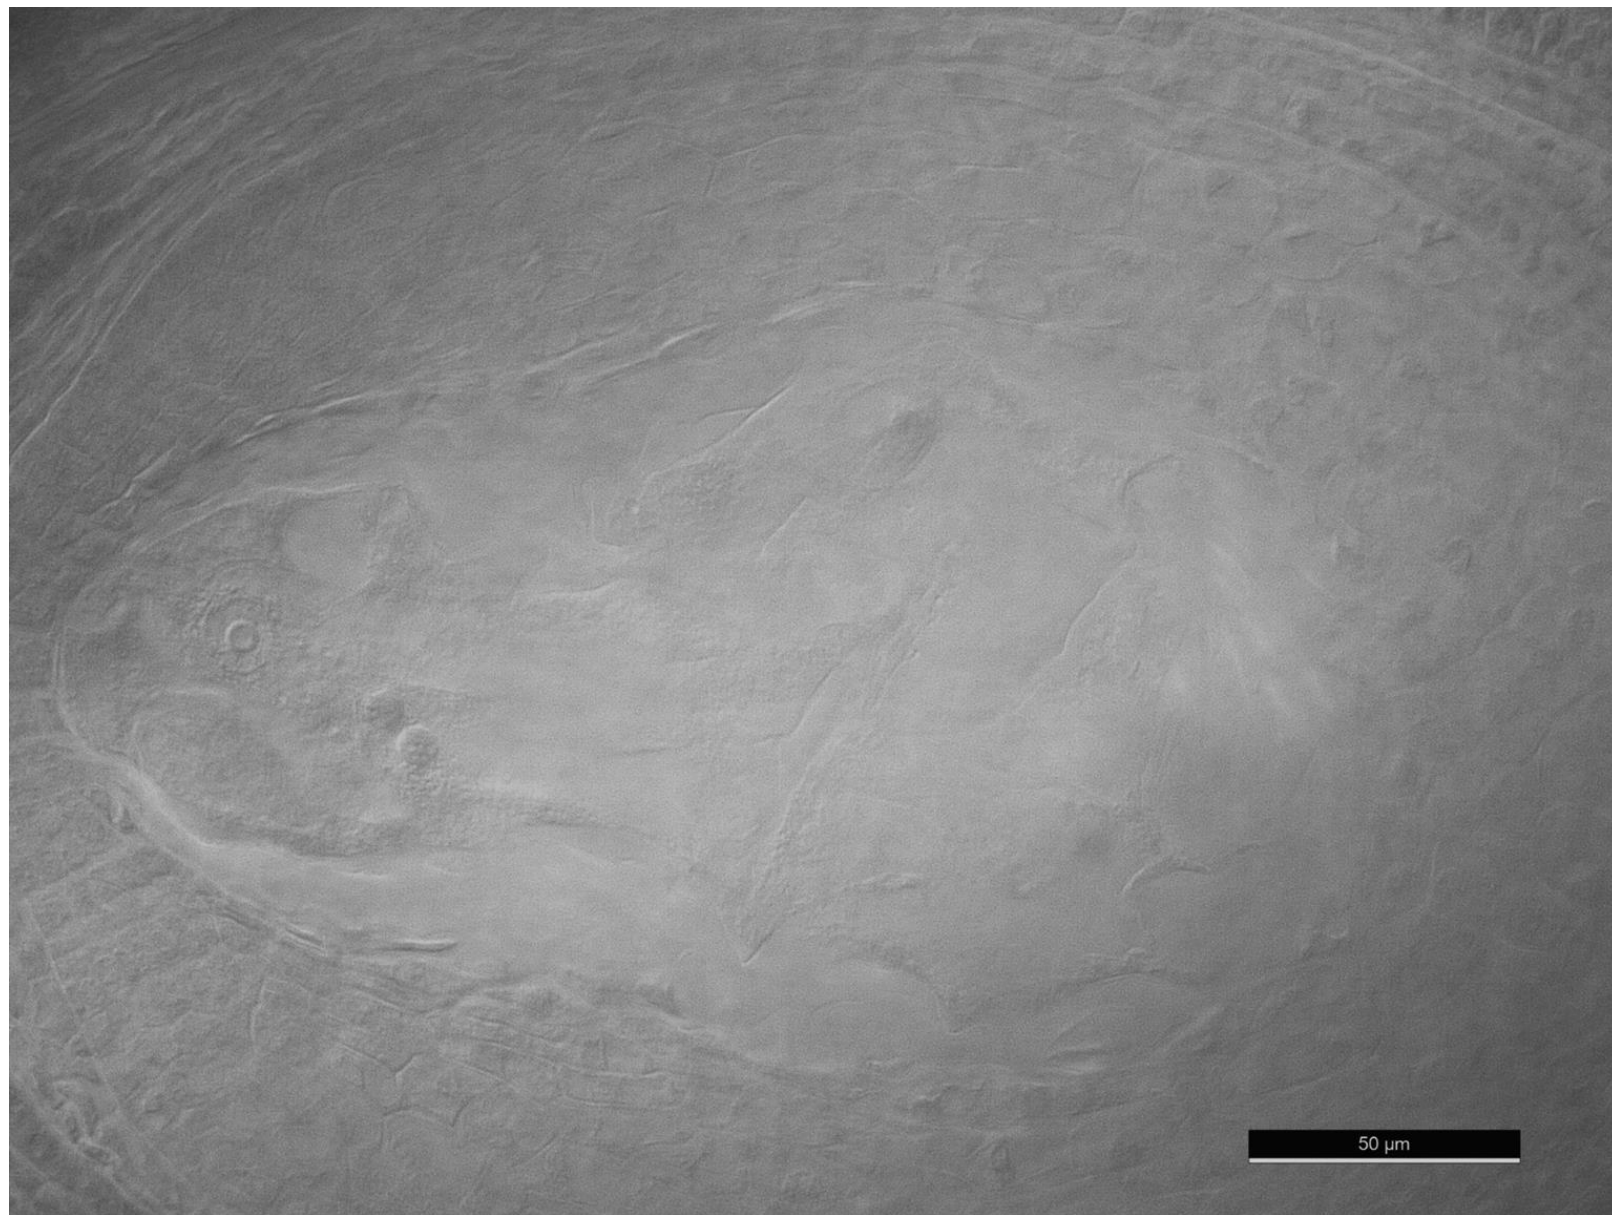

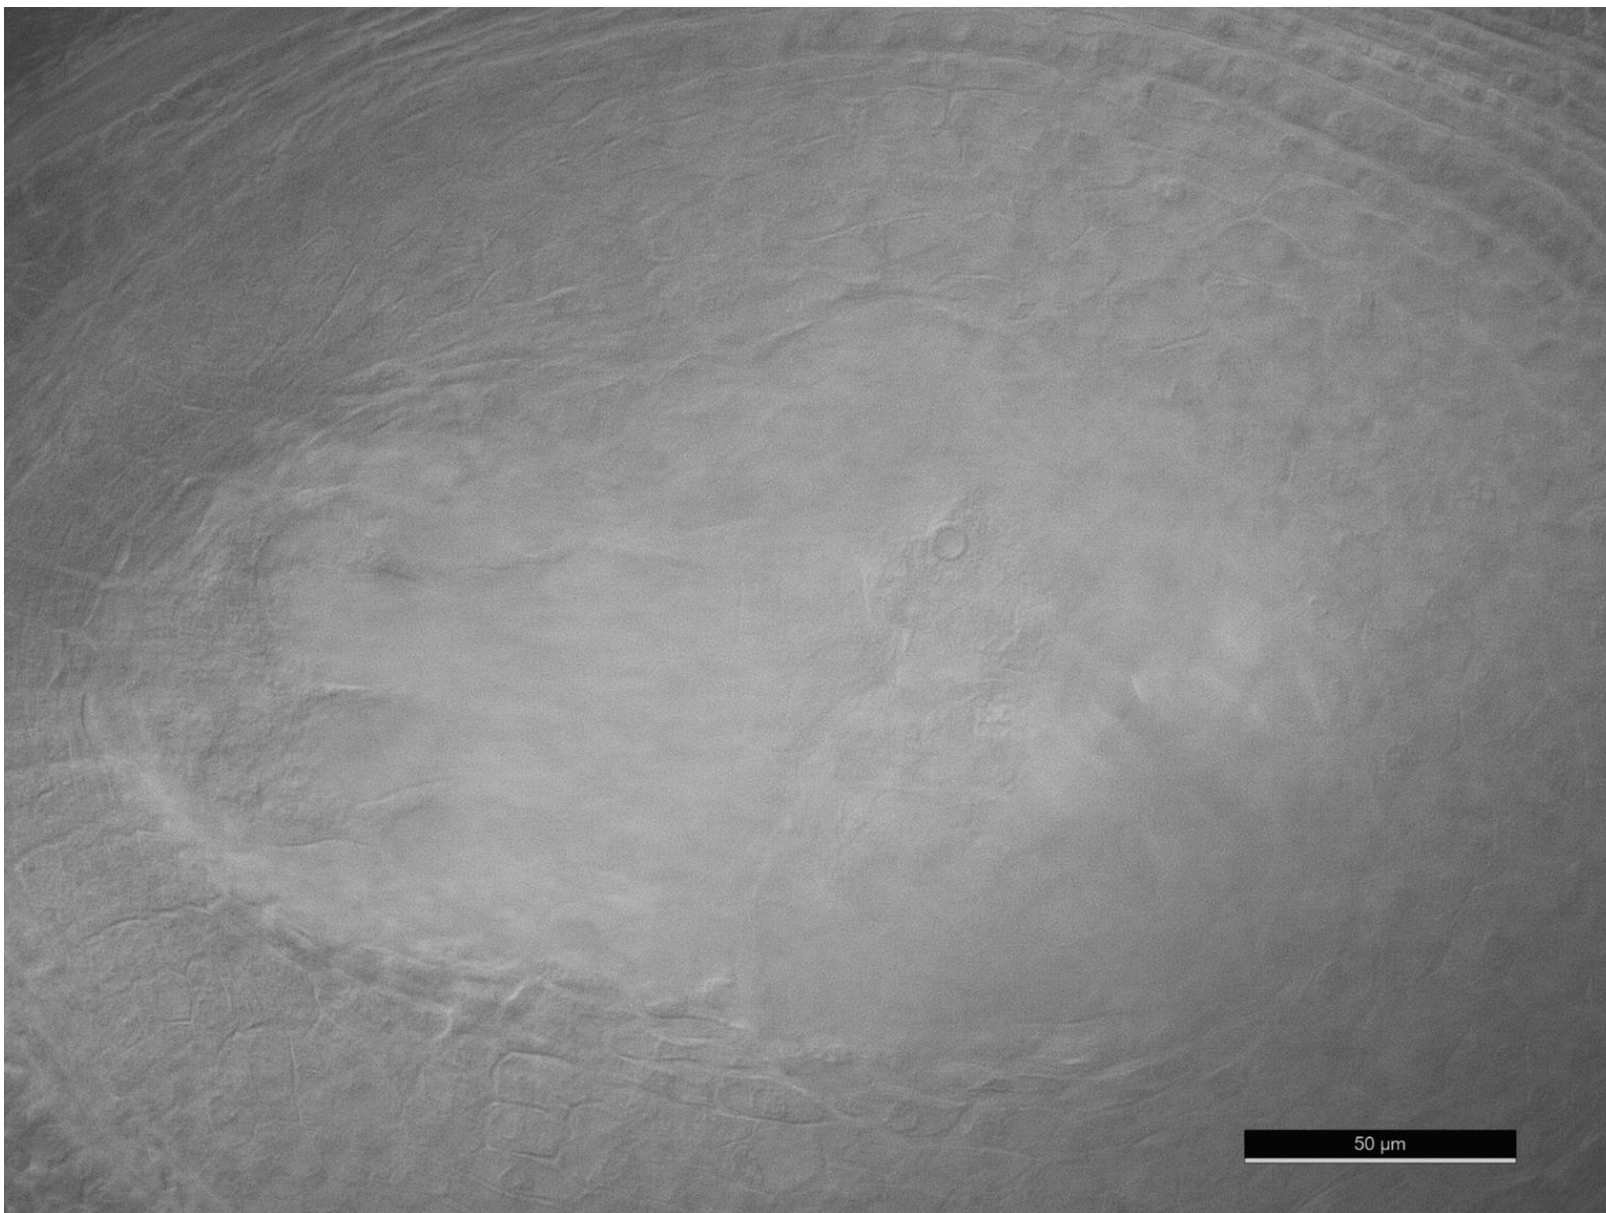

**Fig. 2E ovule, antisense plant E2.9,  
focal plane 4**

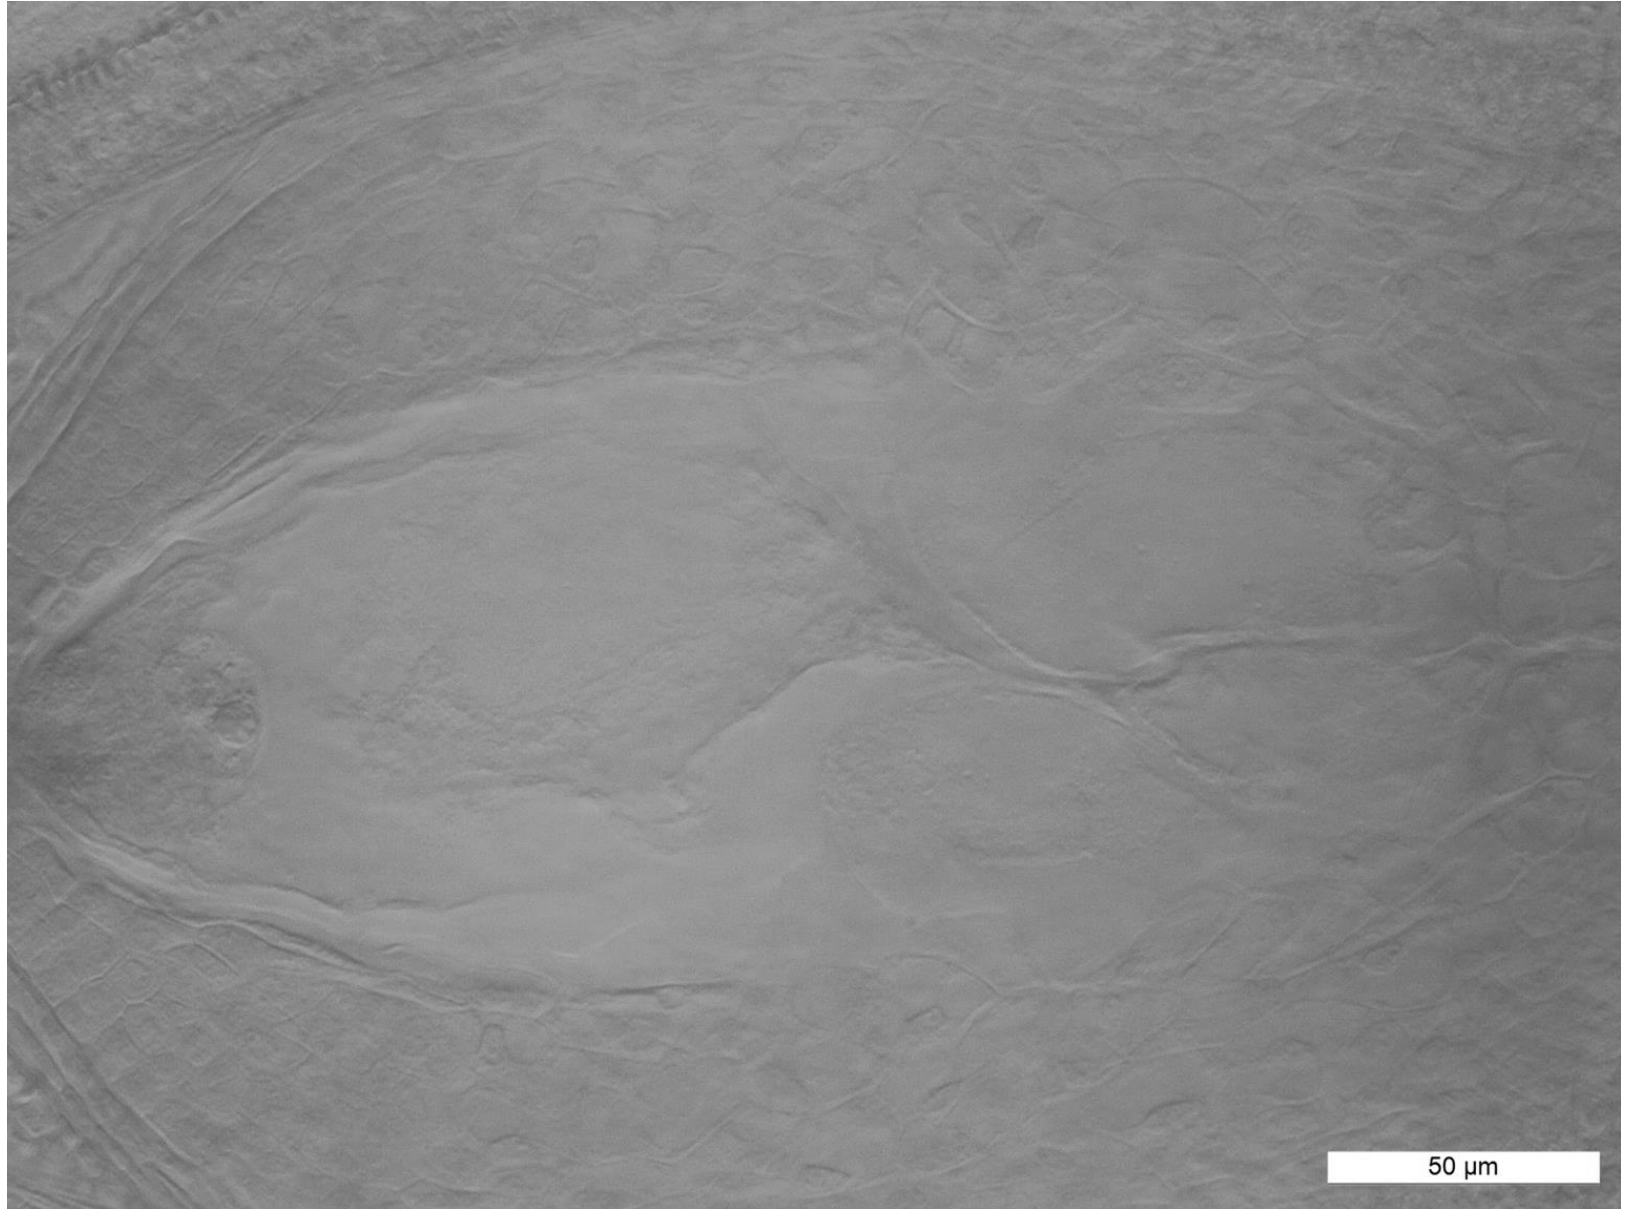

**Fig. 2F ovule, antisense plant E2.13,  
focal plane 1**

**Fig. 2F ovule, antisense plant E2.13,  
focal plane 2**

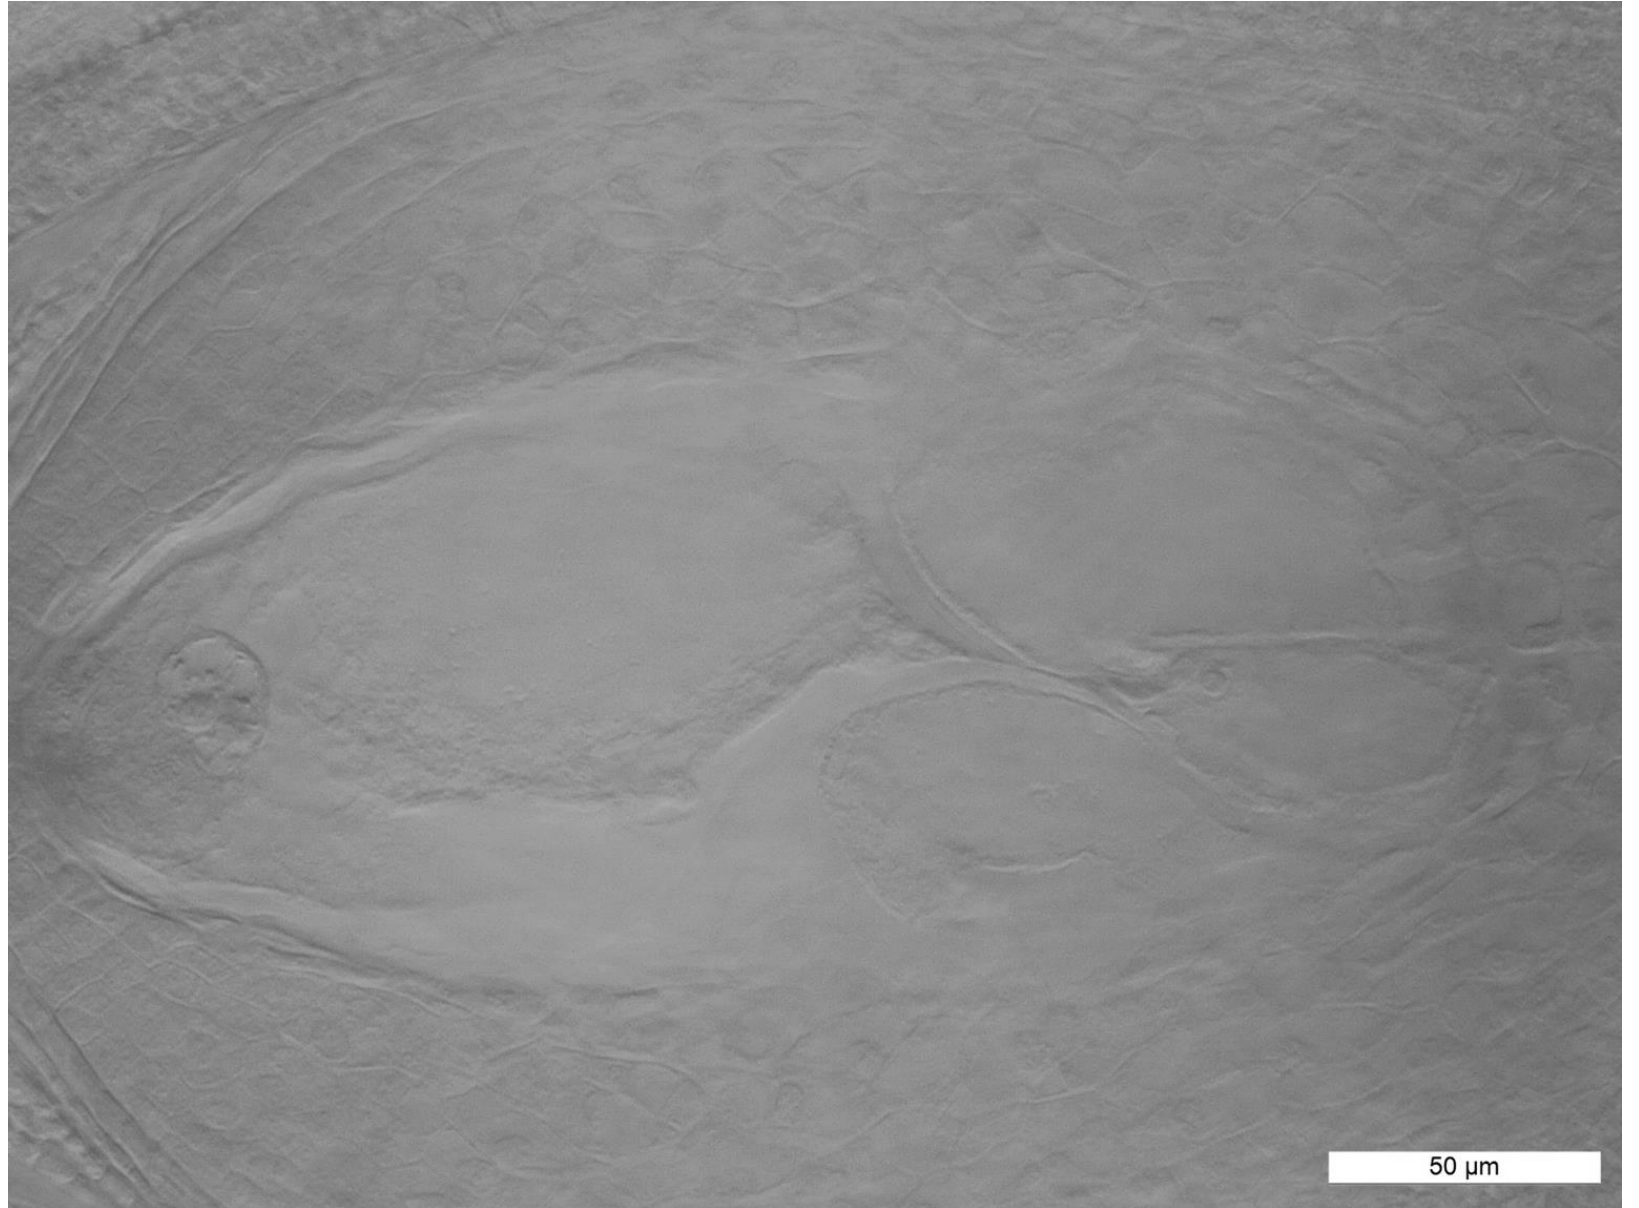

**Fig. 2F ovule, antisense plant E2.13,  
focal plane 3**

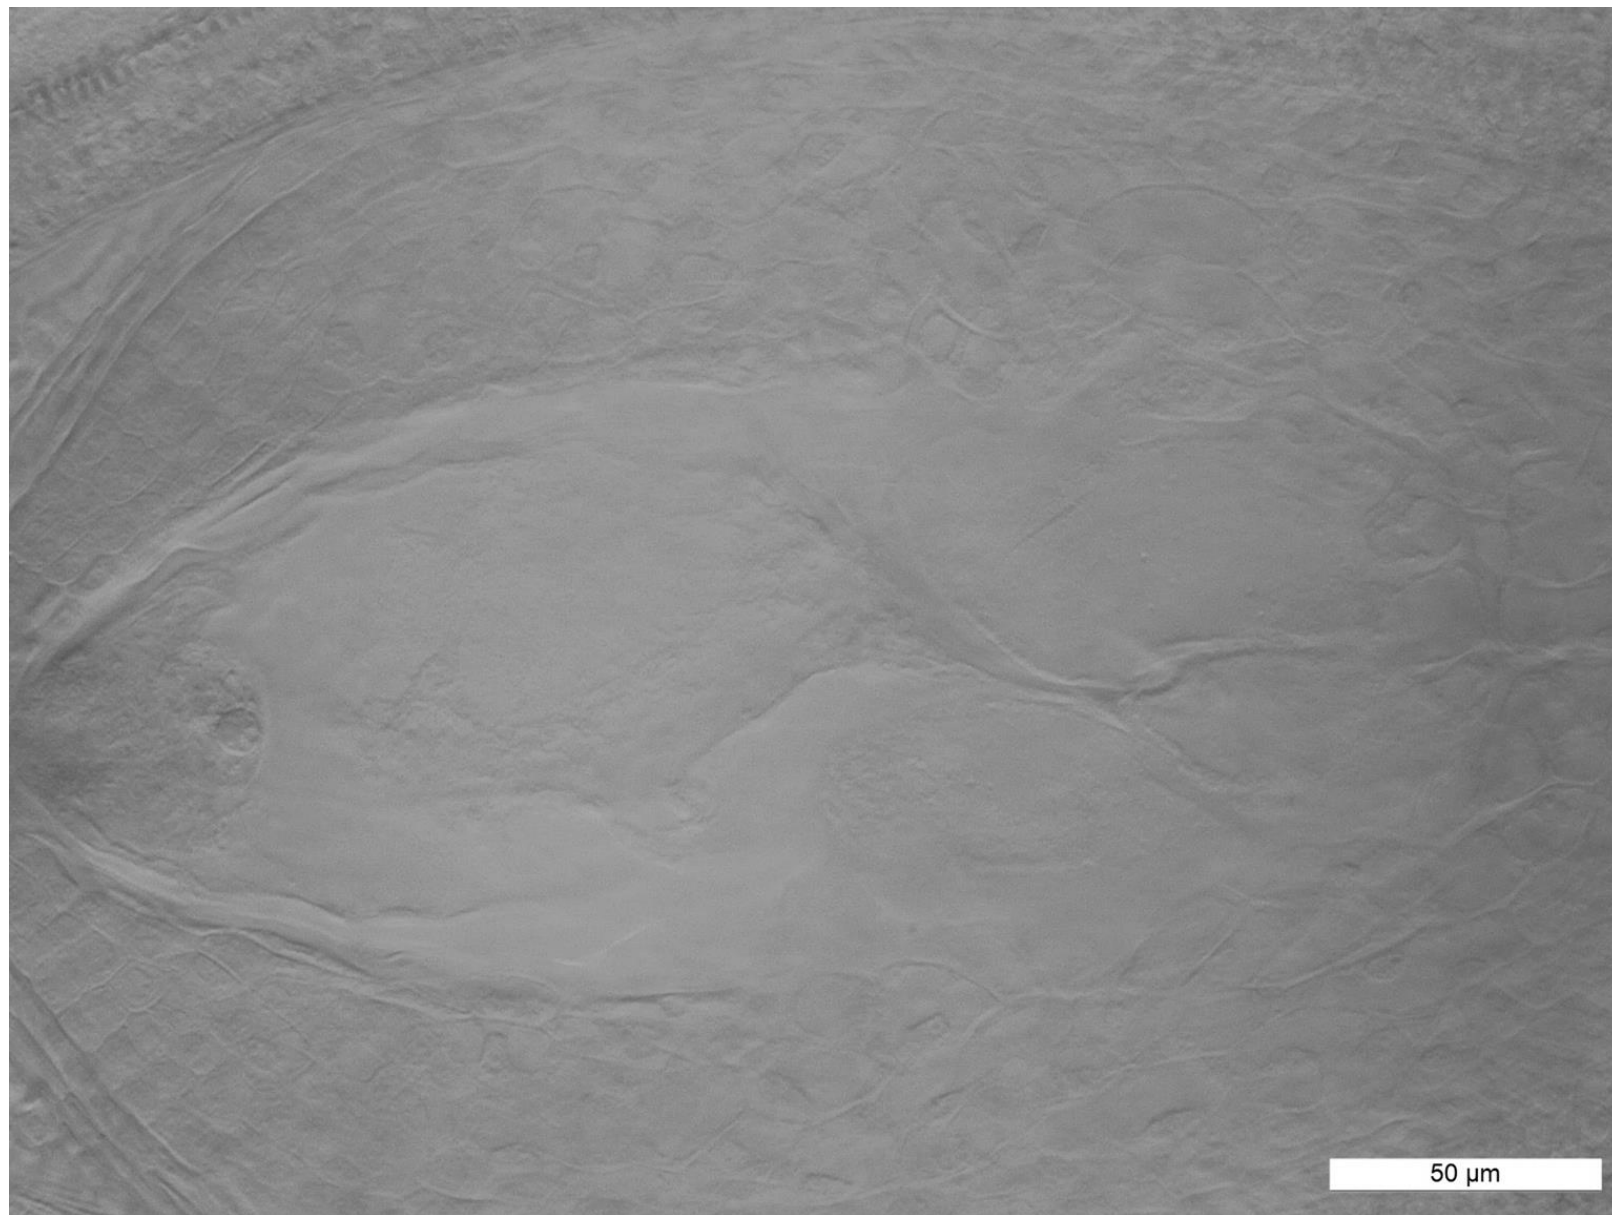

**Fig. 2F ovule, antisense plant E2.13,  
focal plane 4**

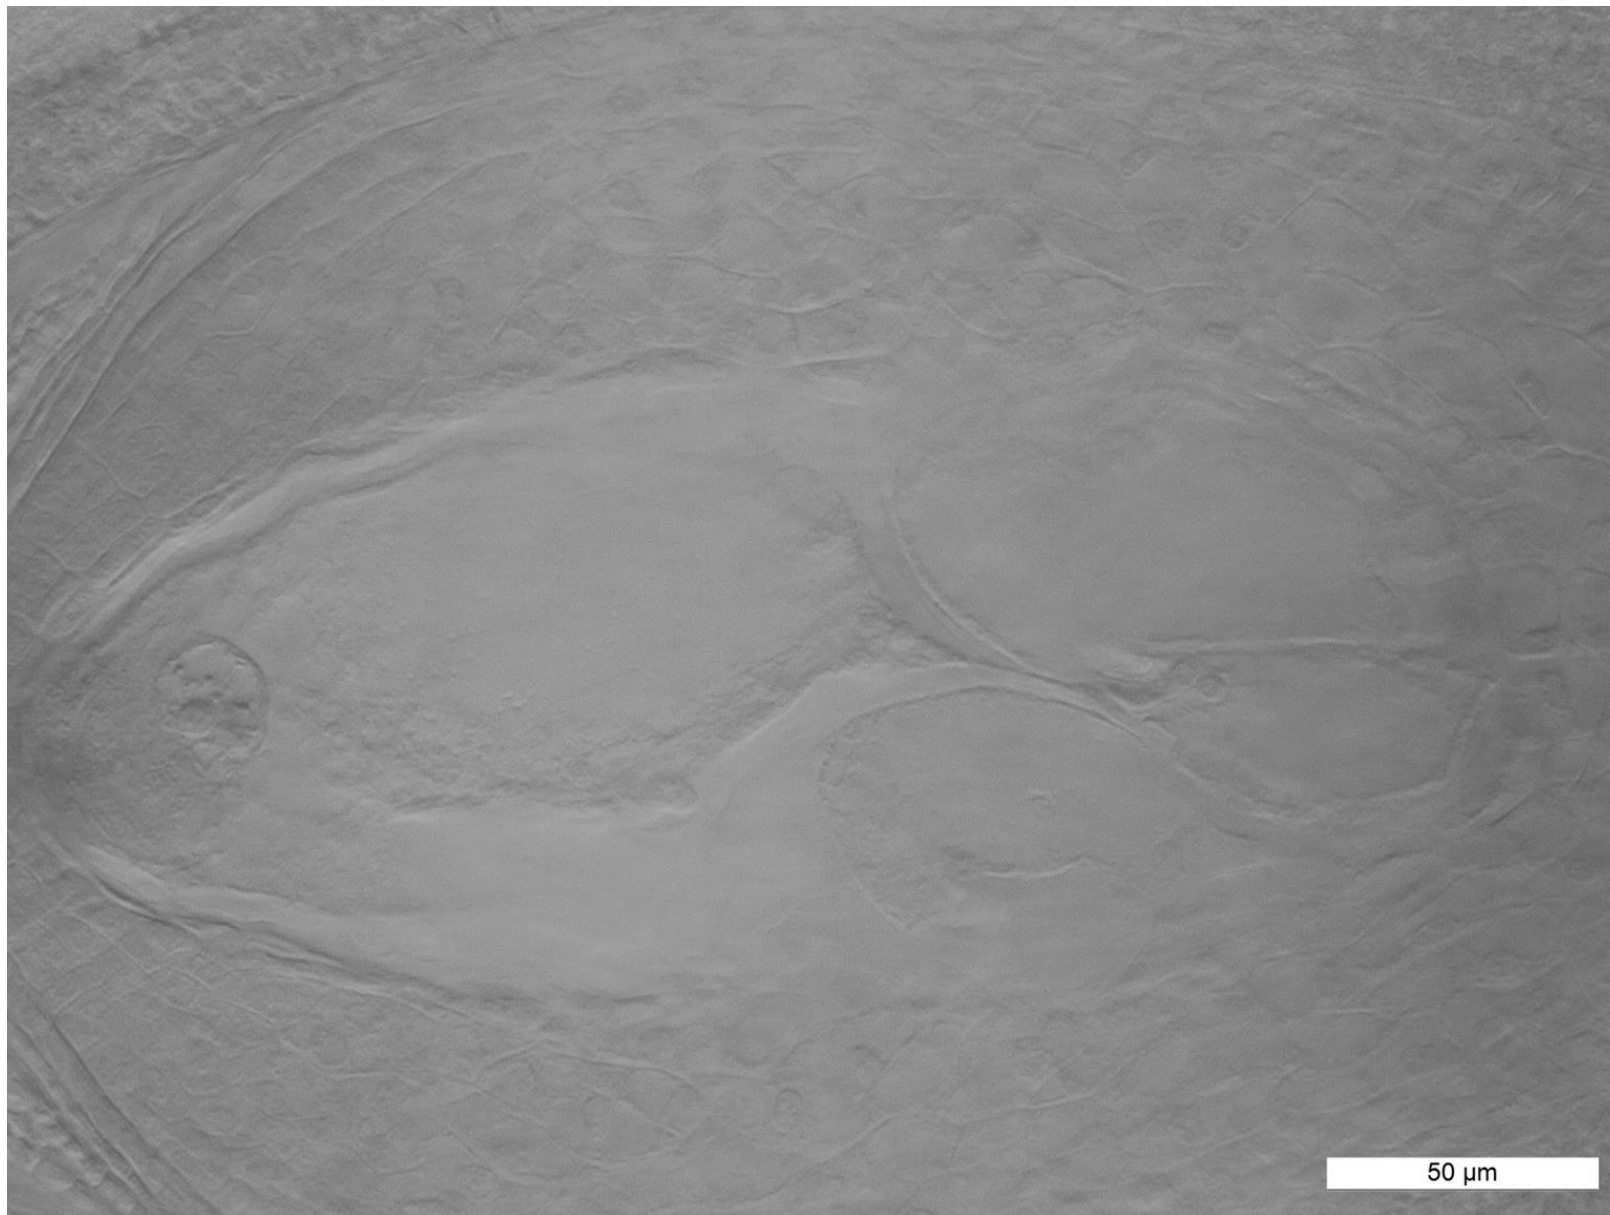



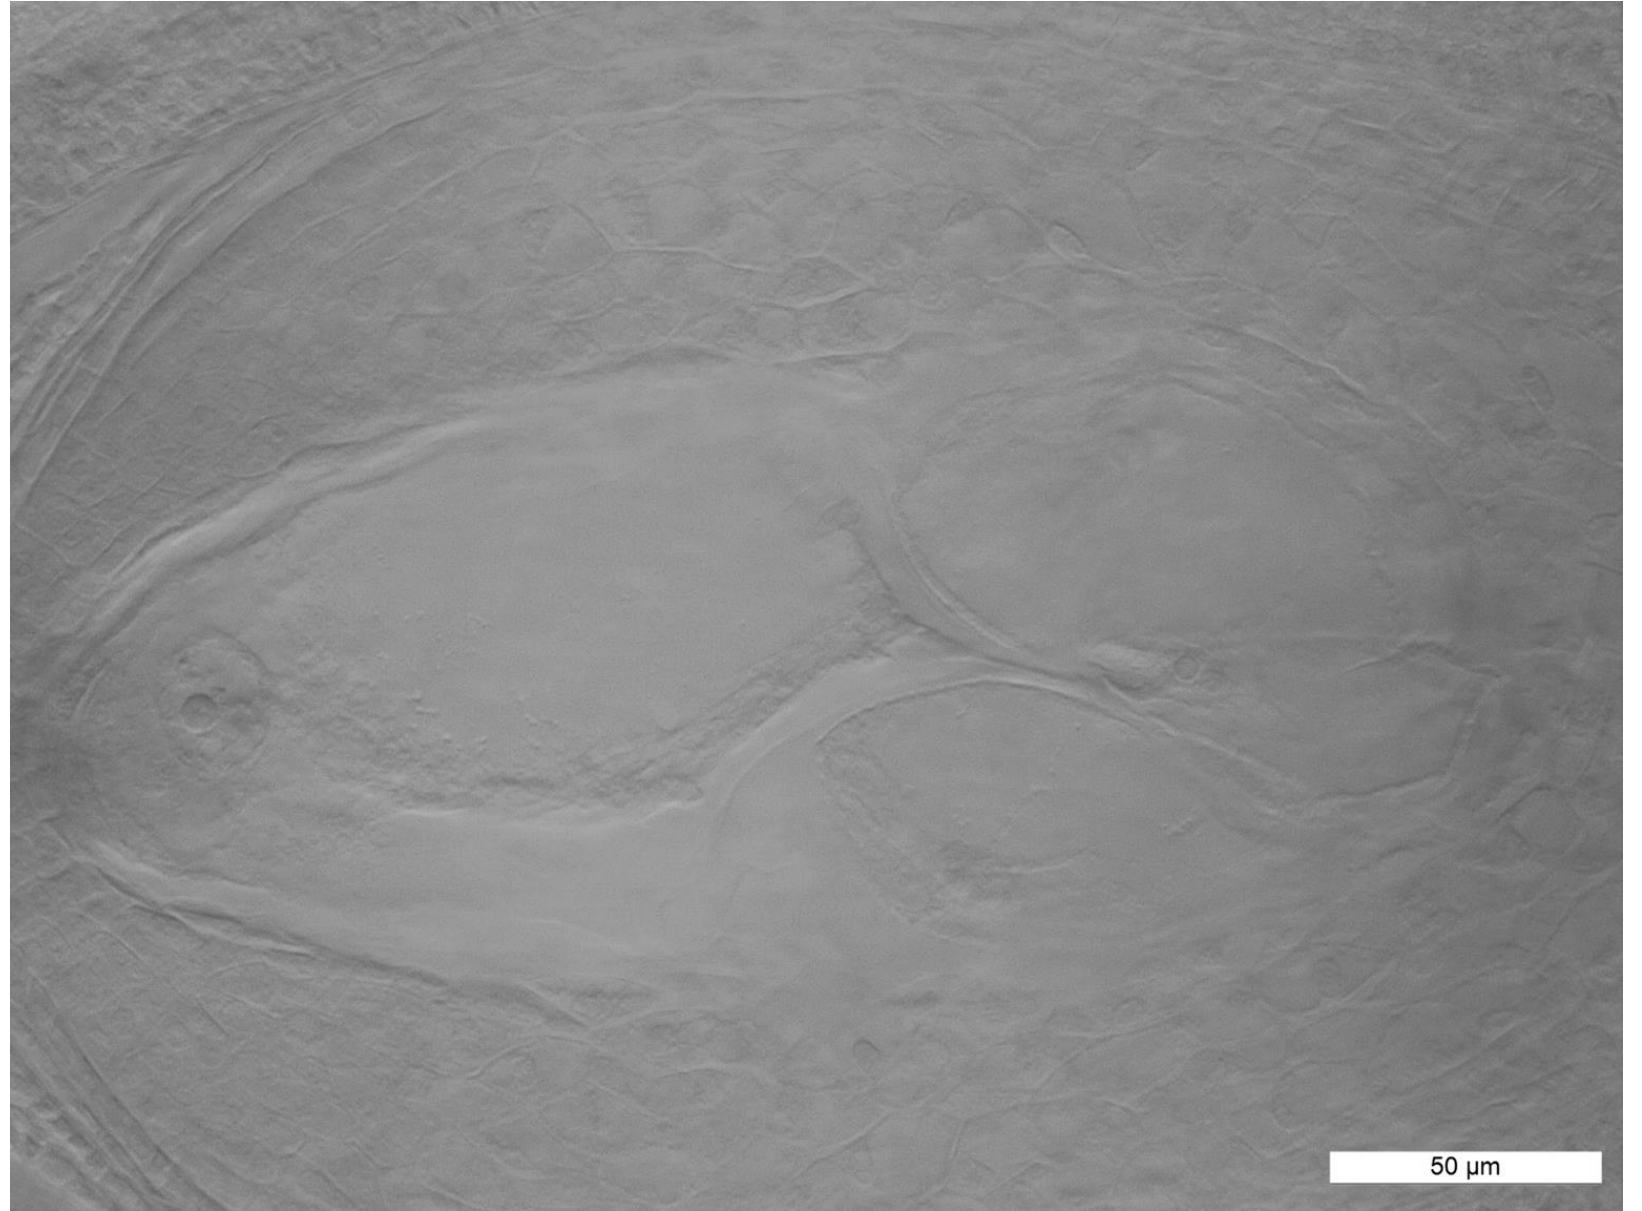

**Fig. 2F ovule, antisense plant E2.13,  
focal plane 5**

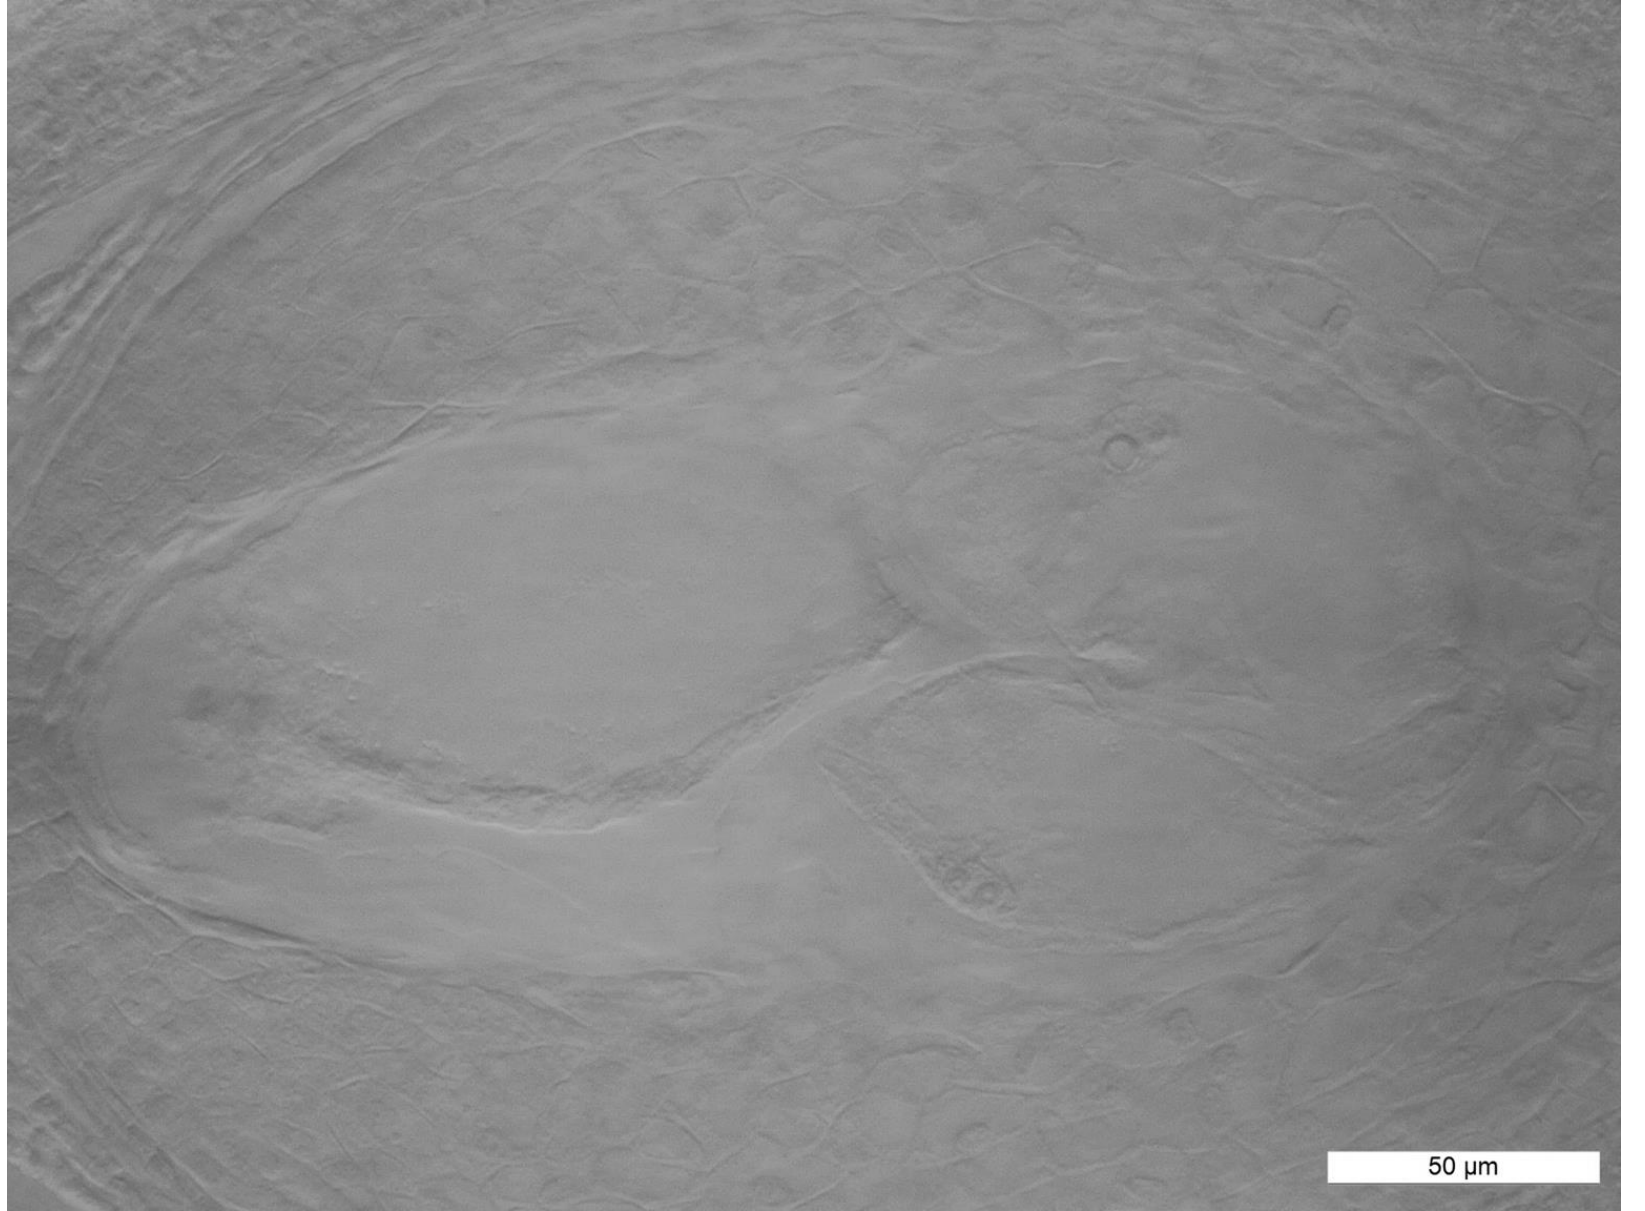

**Fig. 2F ovule, antisense plant E2.13,  
focal plane 6**

**Fig. 2F ovule, antisense plant E2.13,  
focal plane 7**

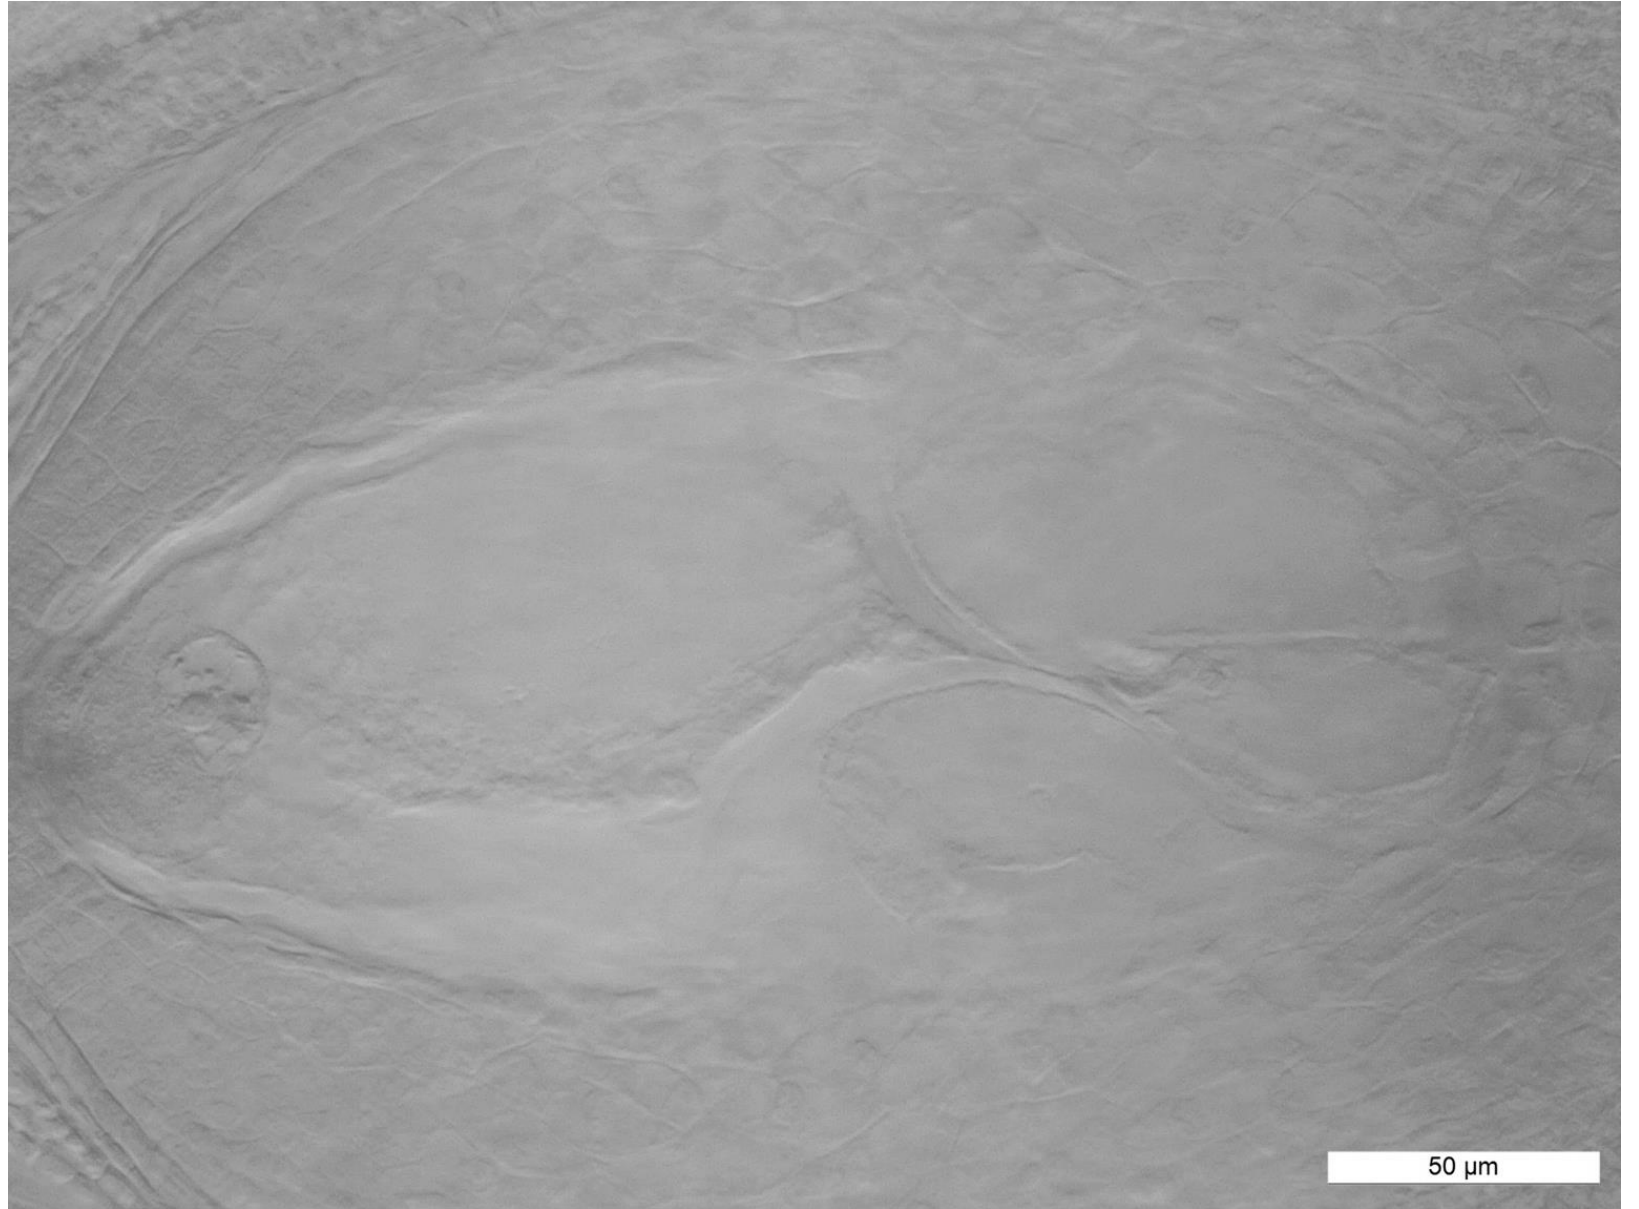

**Meiotic ovule containing a single sexual embryo sac (antipodal cells at the top). Image originated from sexual control plant F58 (sexual polycross used as explant in transformation experiments). Focal plane 1.**

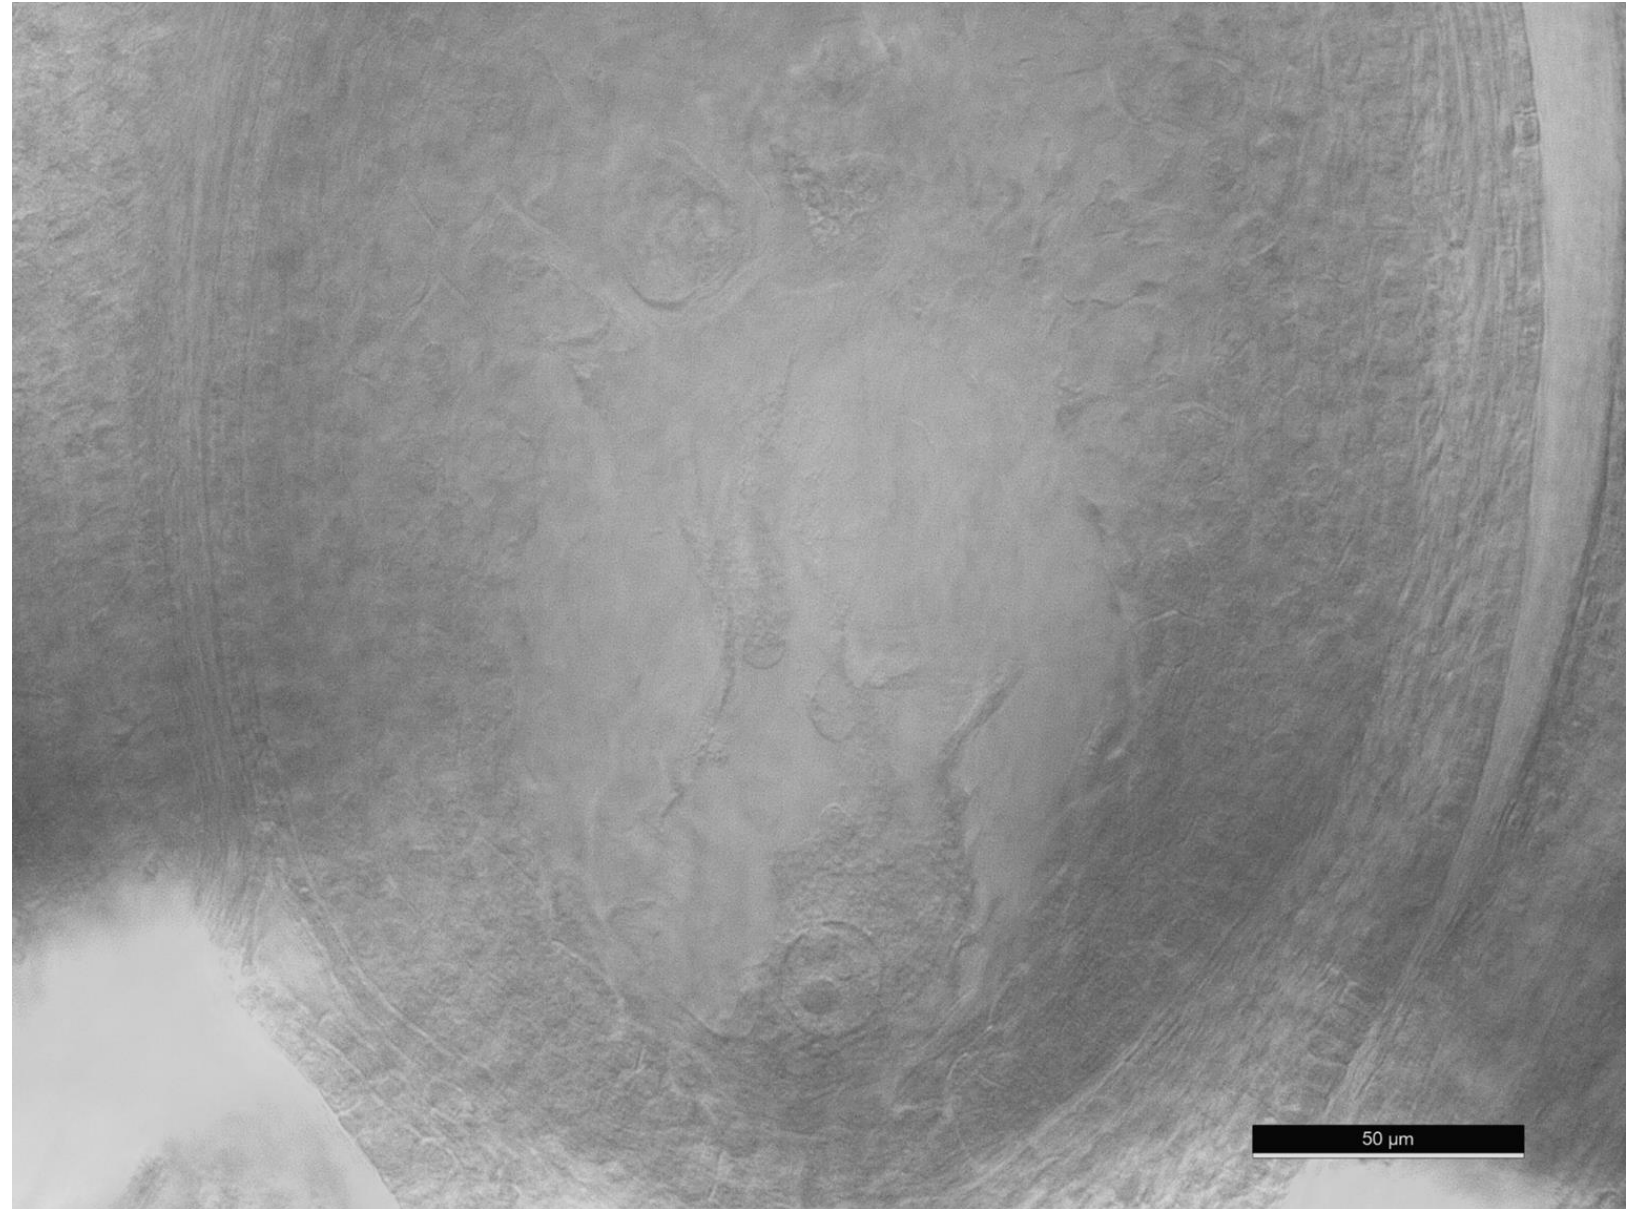

**Meiotic ovule containing a single sexual embryo sac (antipodal cells at the top). Image originated from sexual control plant F58 (sexual polycross used as explant in transformation experiments). Focal plane 2.**

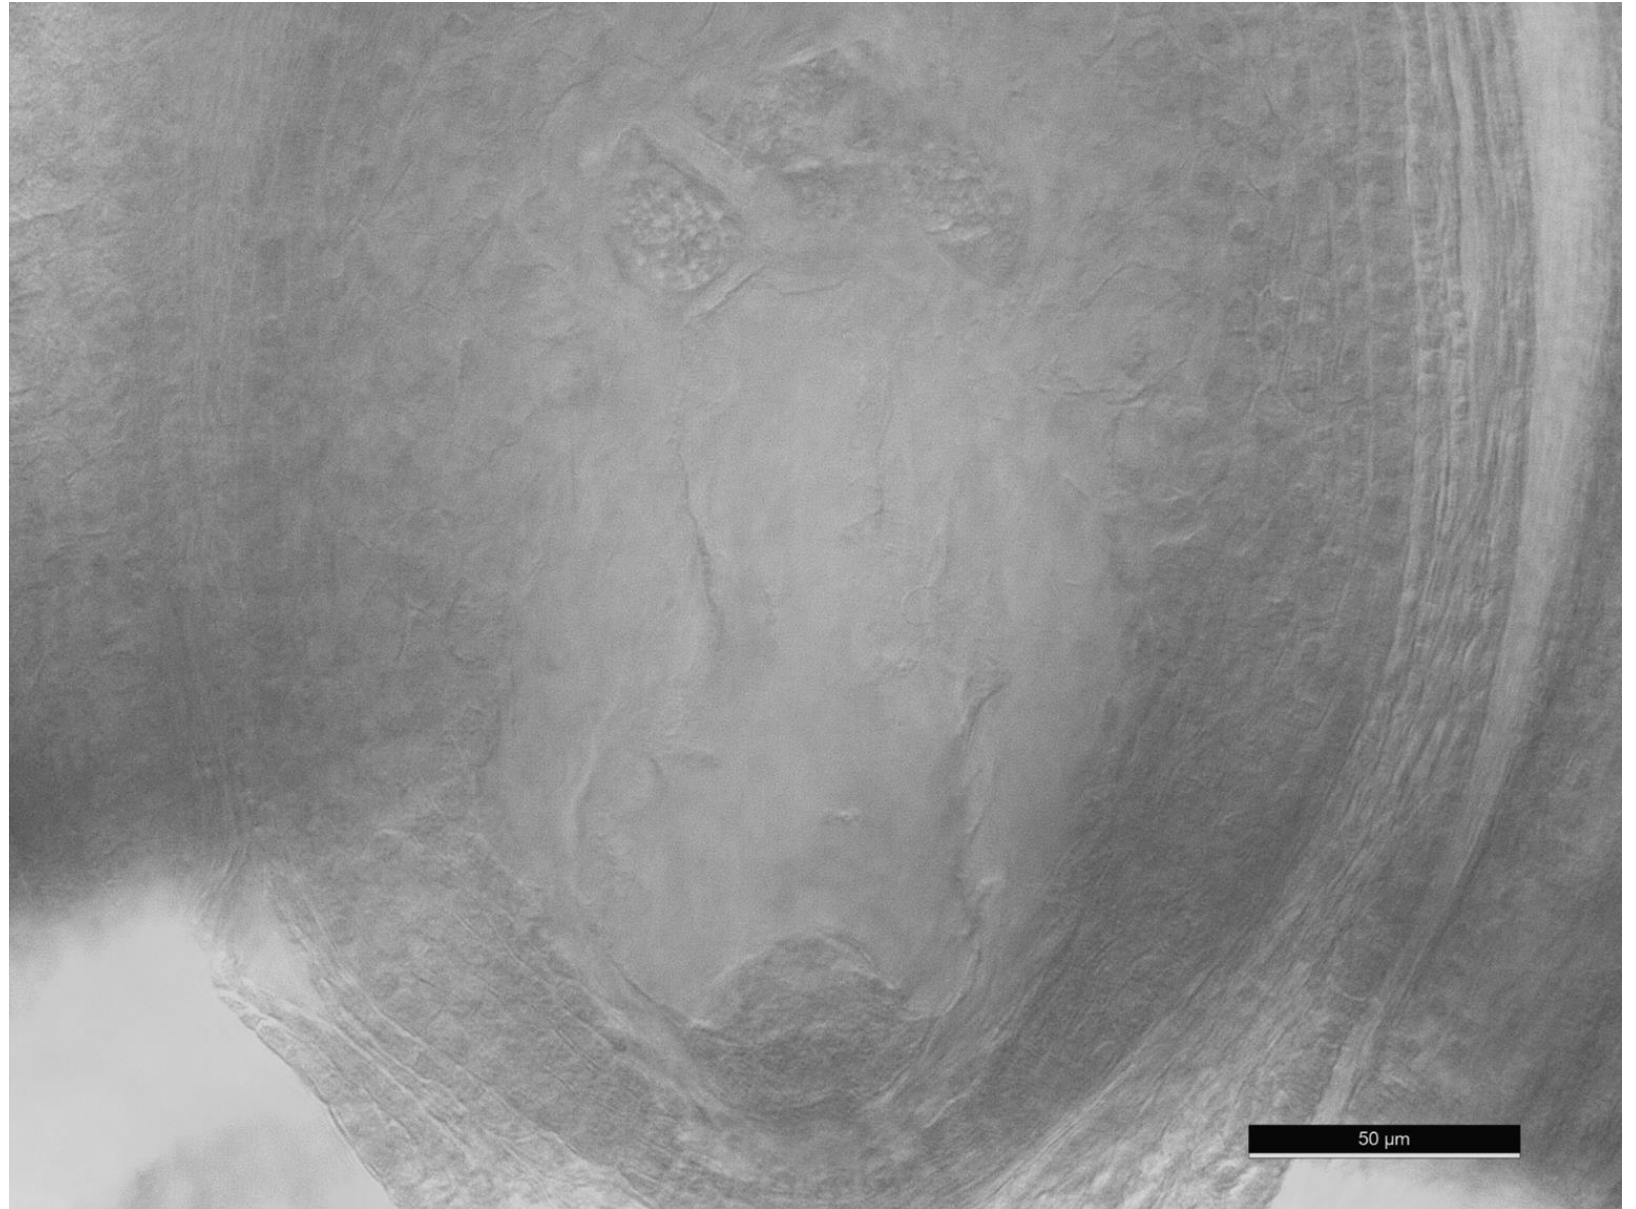

**Meiotic ovule containing a single sexual embryo sac (antipodal cells at the top). Image originated from sexual control plant F58 (sexual polycross used as explant in transformation experiments). Focal plane 3.**

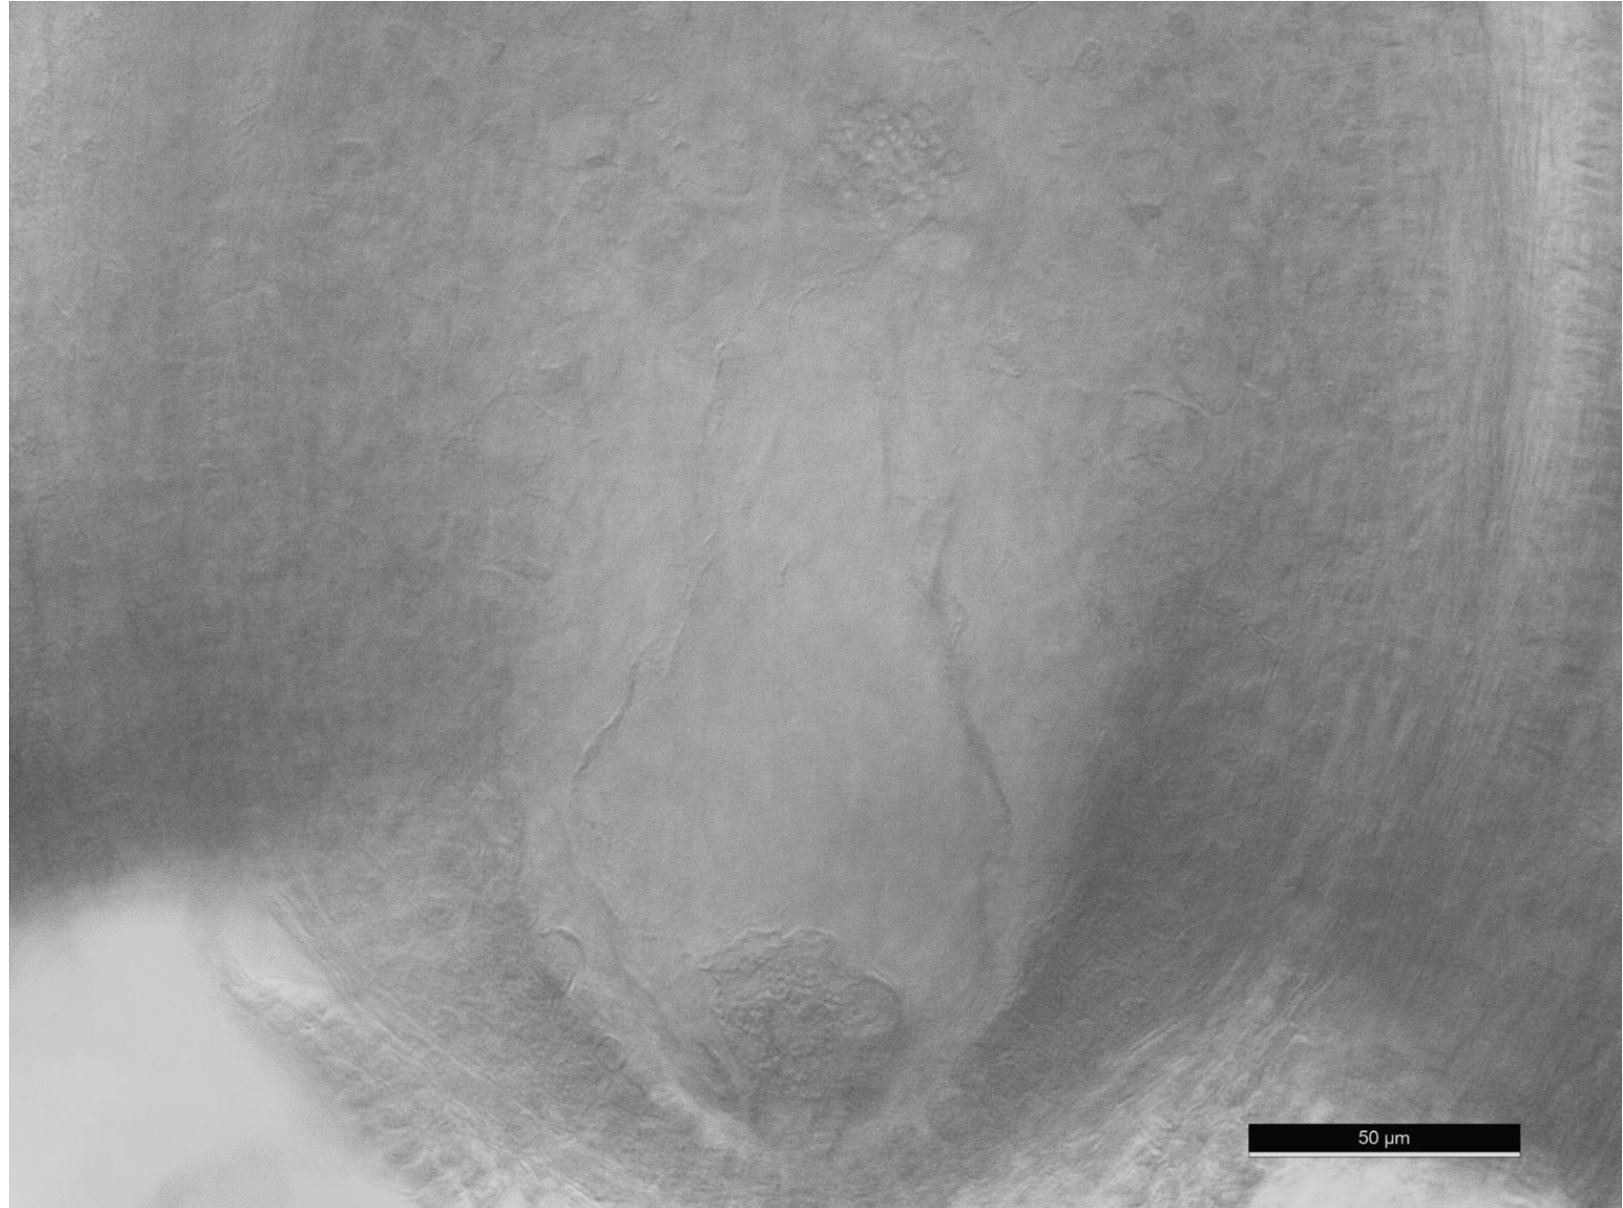

**Meiotic ovule containing a single sexual embryo sac (antipodal cells at the top). Image originated from sexual control plant F58 (sexual polycross used as explant in transformation experiments). Focal plane 4.**

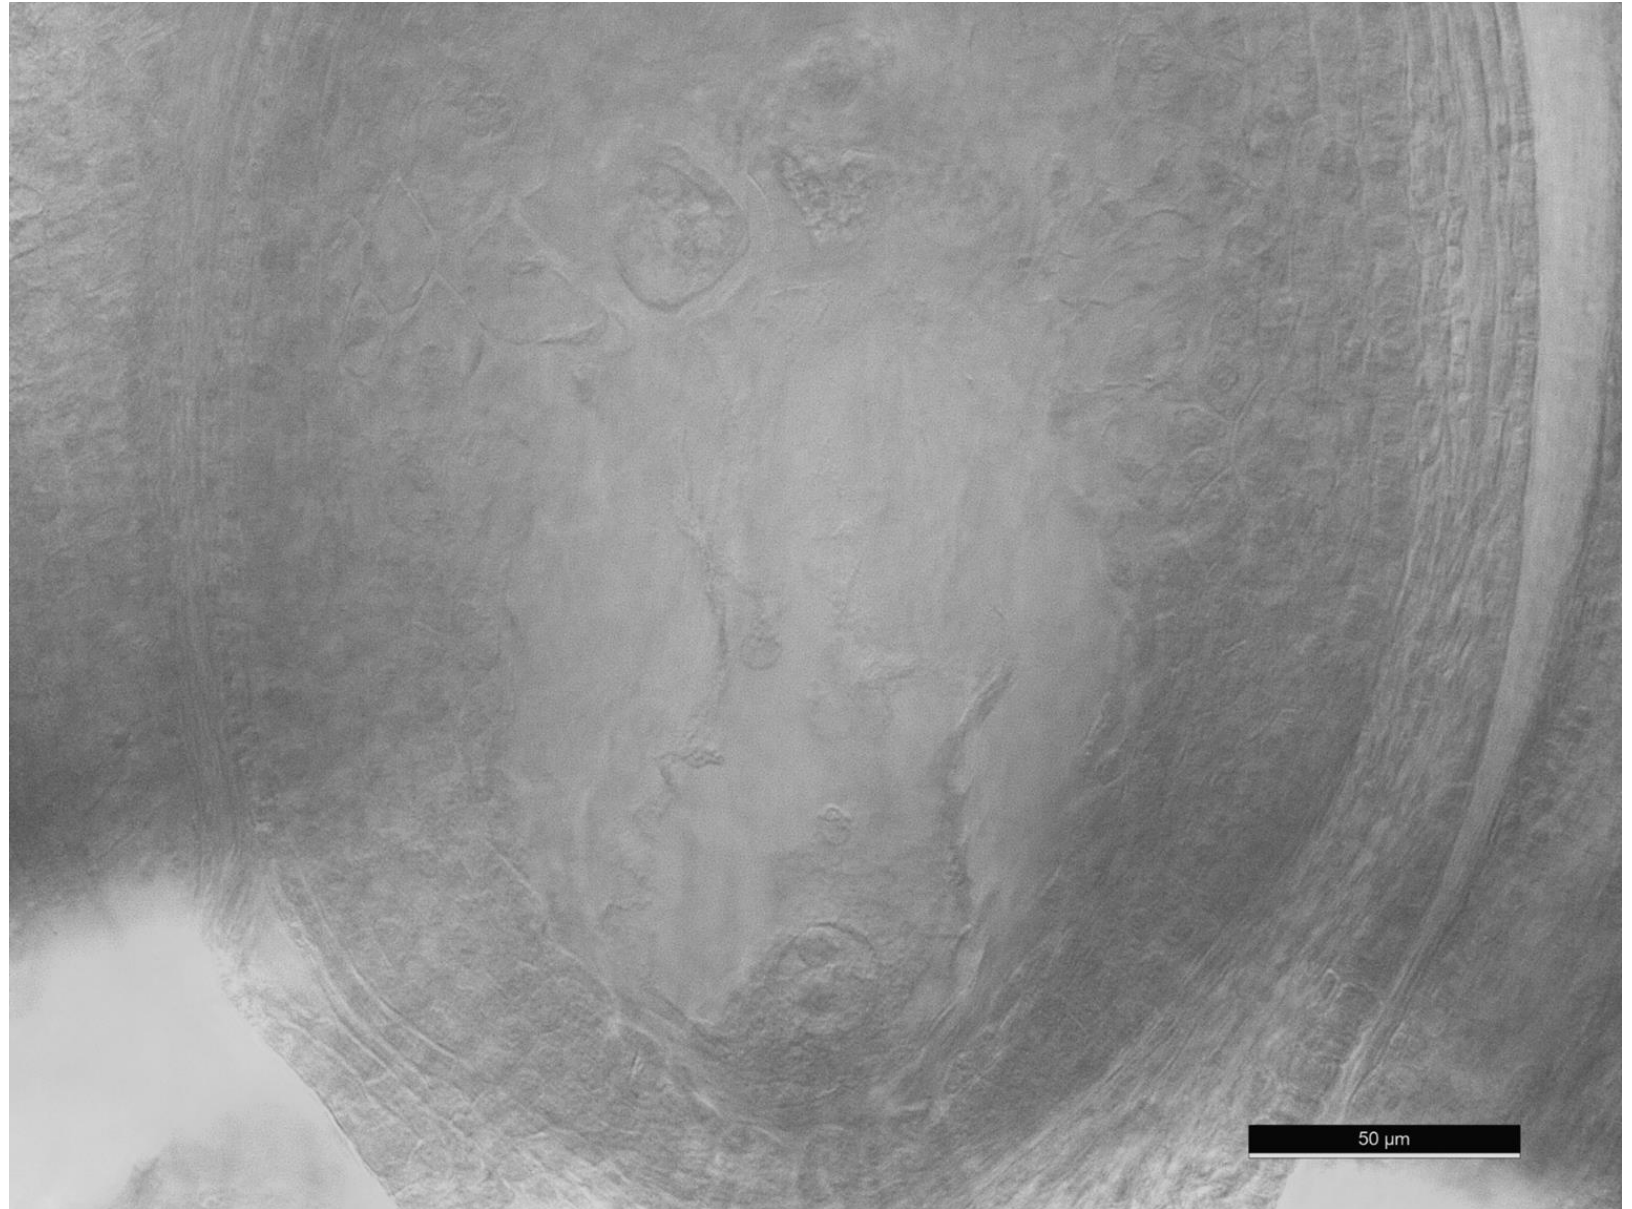

**Aposporous ovule containing several mature AES, originated from obligate apomictic plant Q4117 (apomictic control), focal plane 1.**

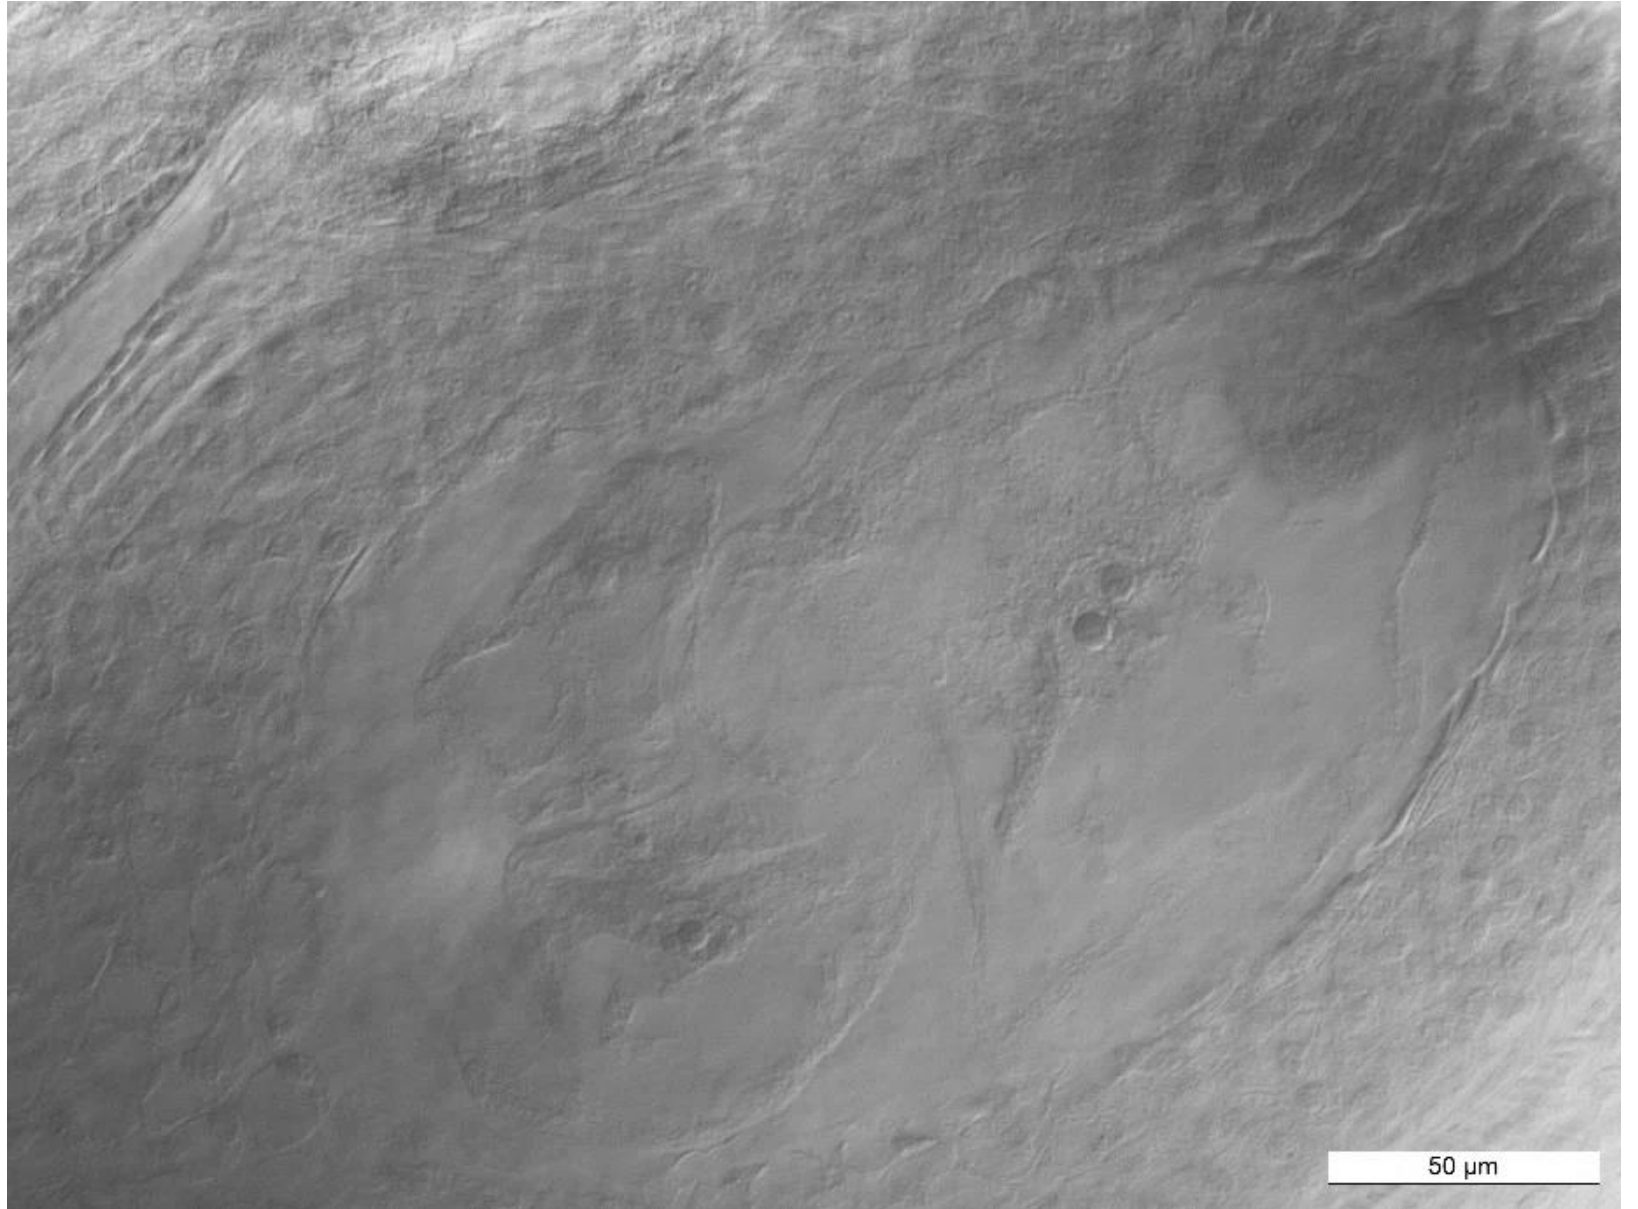



**Aposporous ovule containing several mature AES, originated from obligate apomictic plant Q4117 (apomictic control), focal plane 2.**

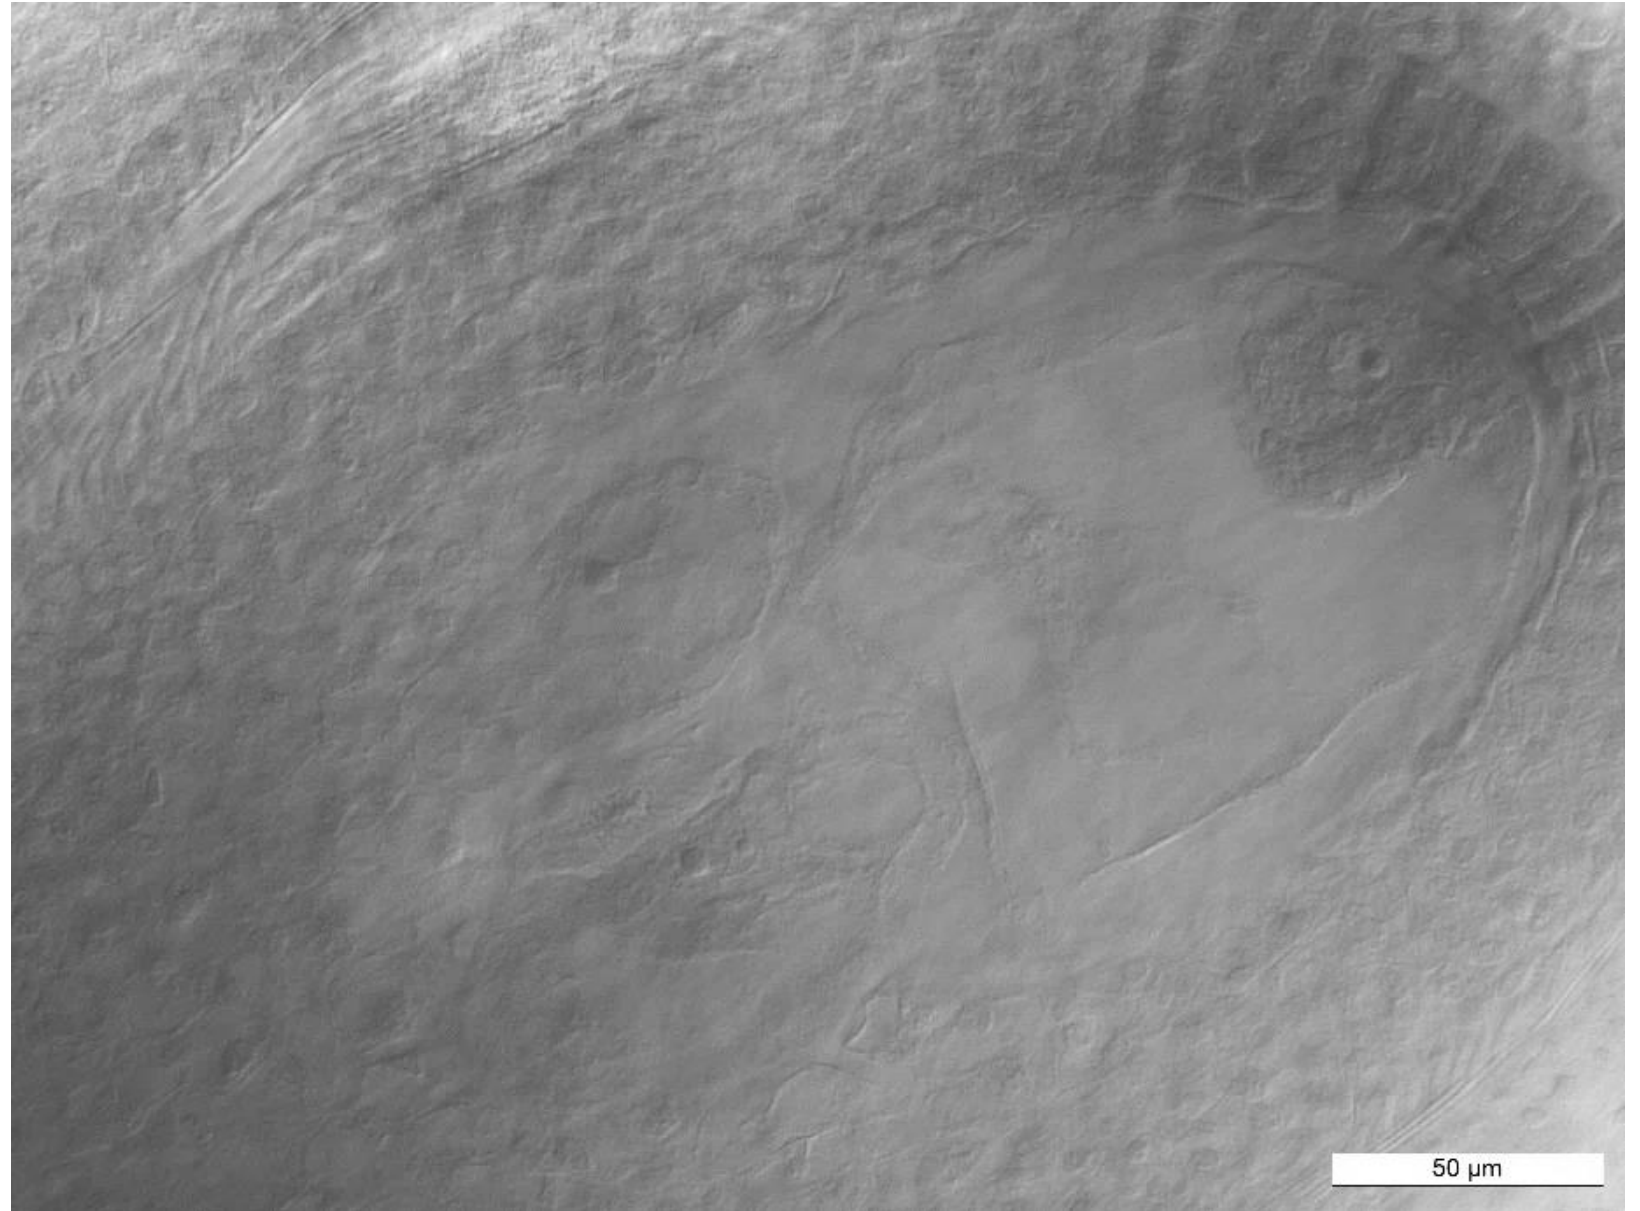

**Aposporous ovule containing several mature AES, originated from obligate apomictic plant Q4117 (apomictic control), focal plane 3.**

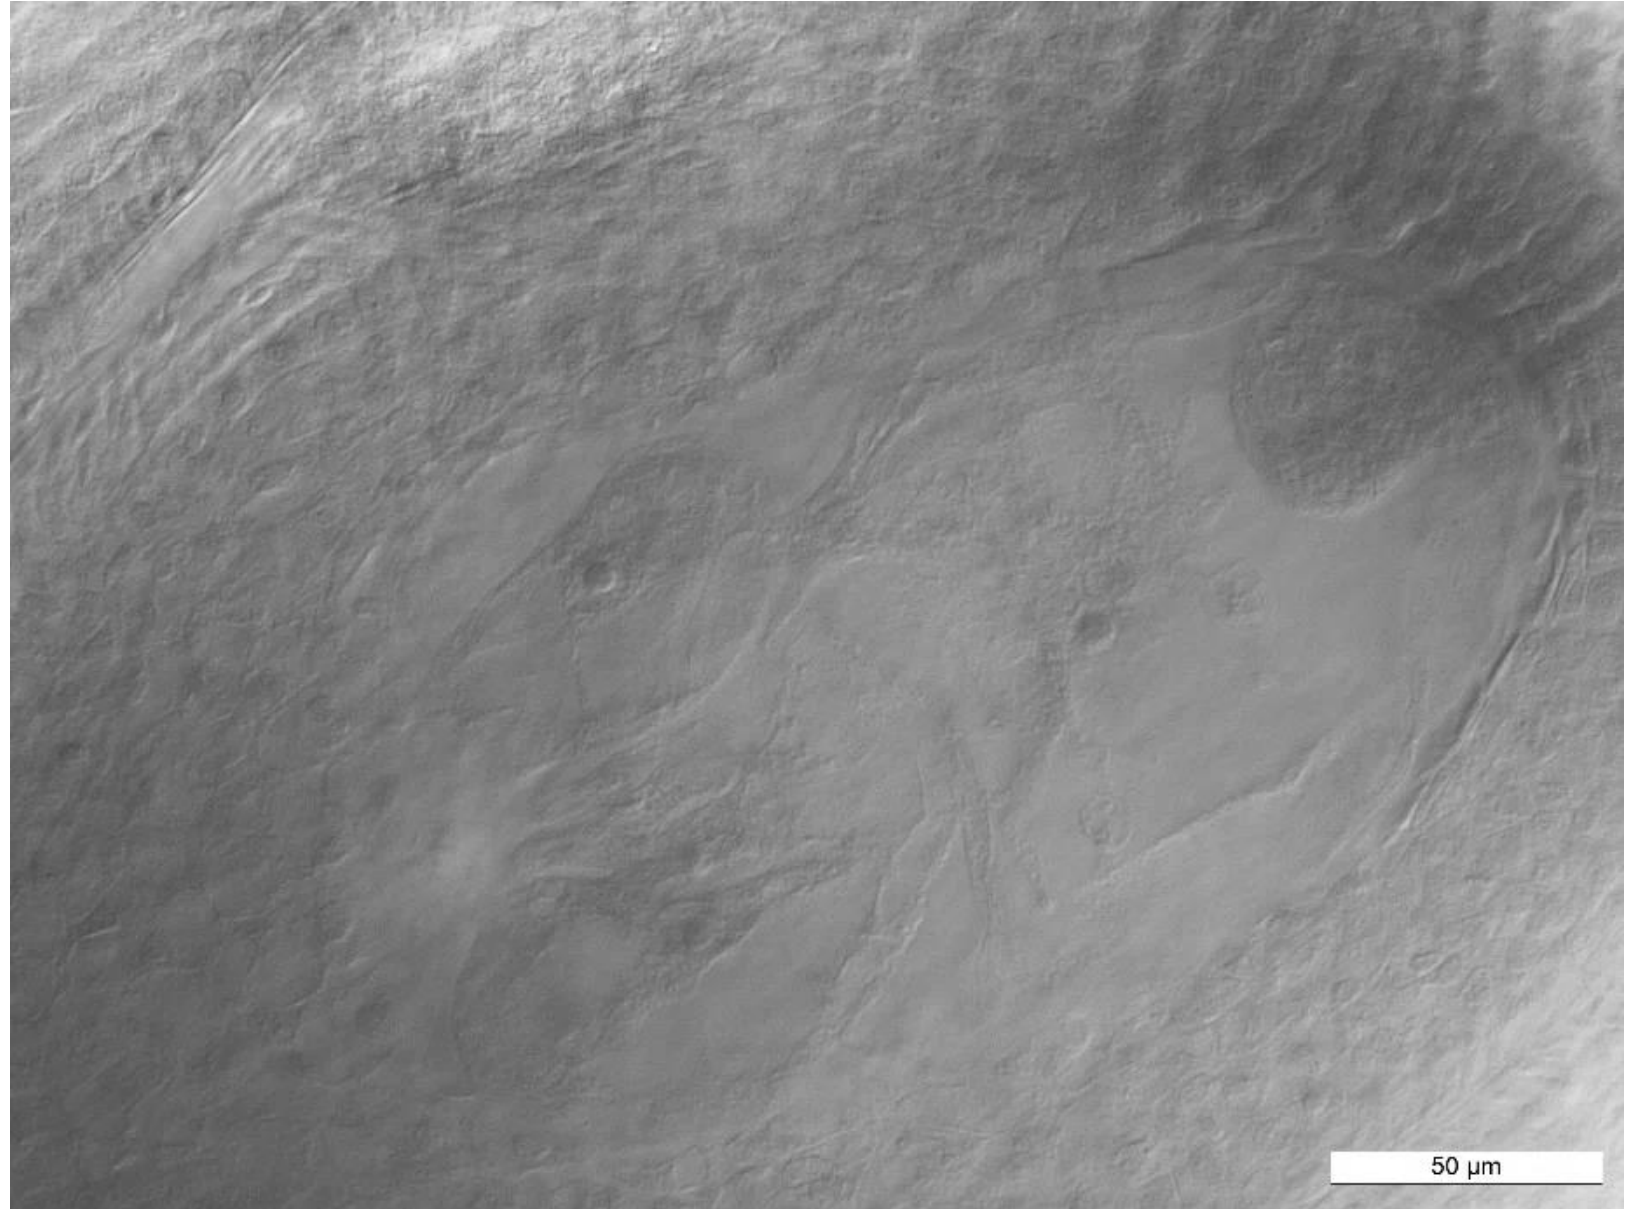

**Aposporous ovule containing several mature AES, originated from obligate apomictic plant Q4117 (apomictic control), focal plane 4.**

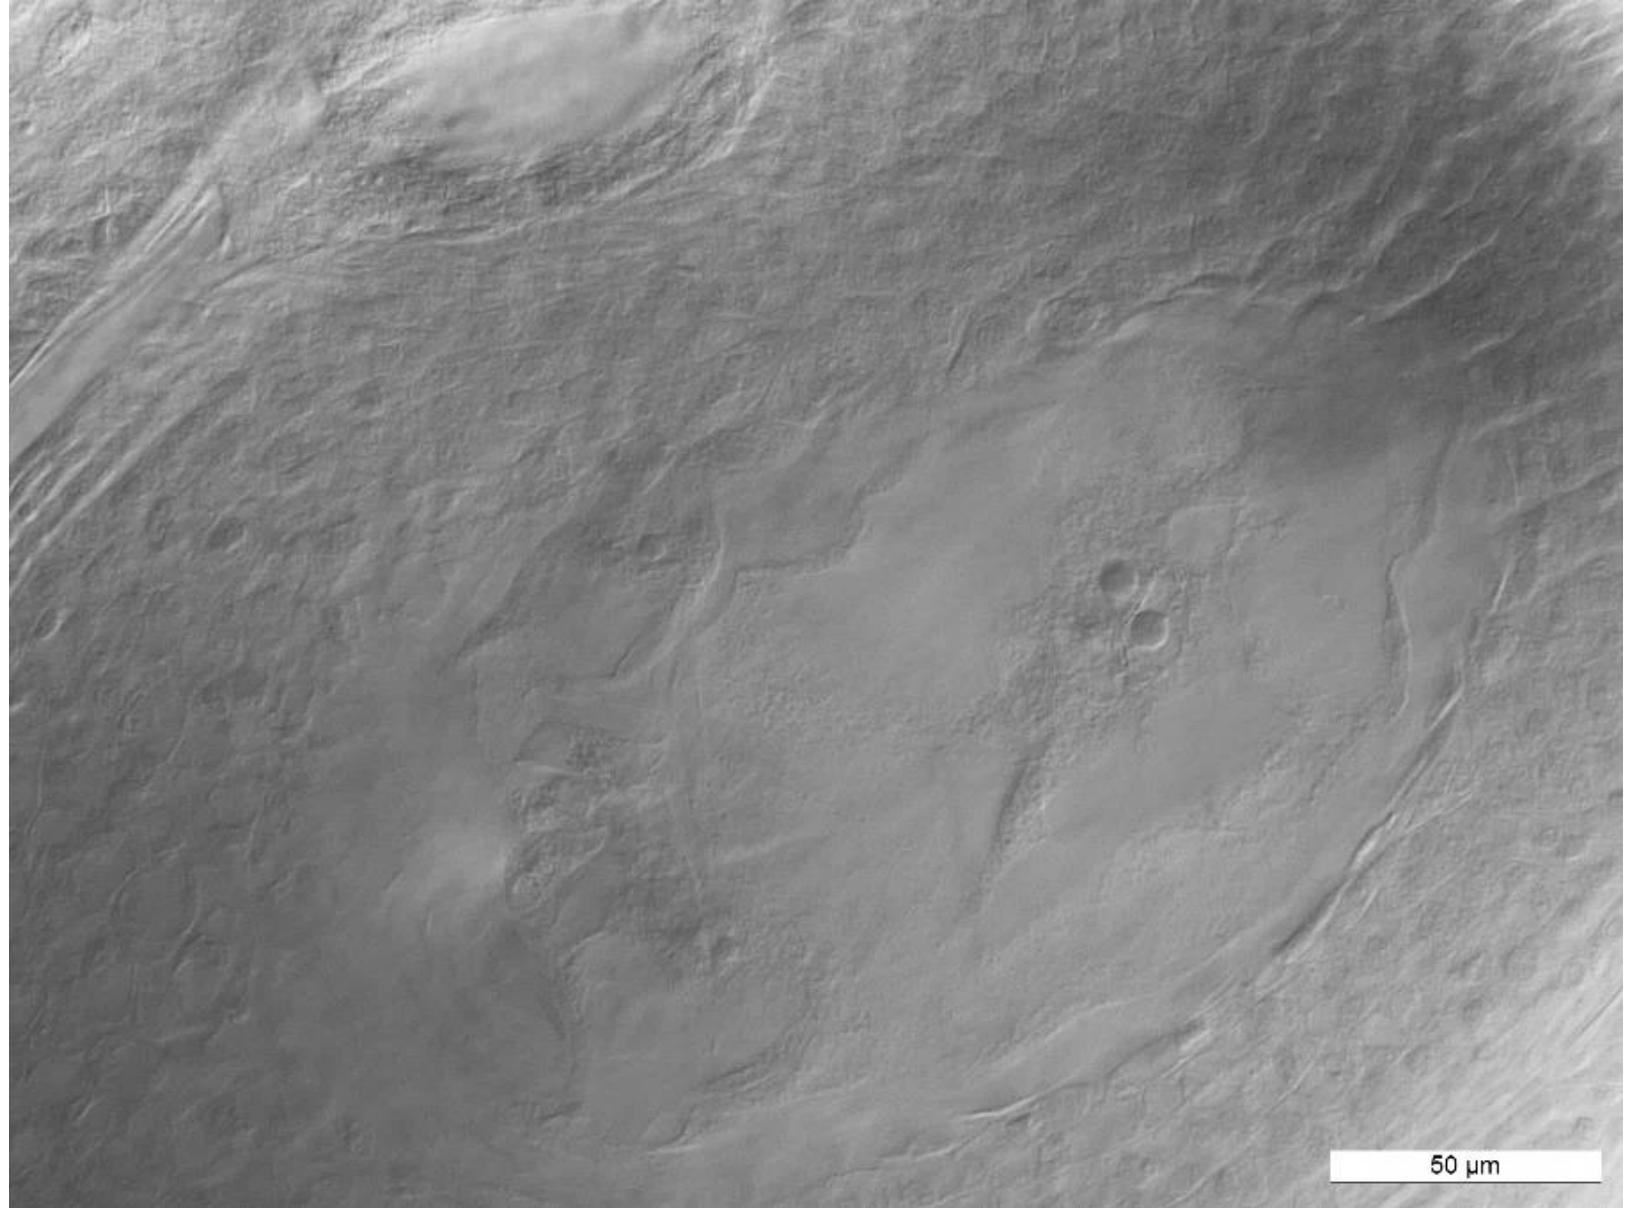

Supplement: DataSheet_3.pdf [file DataSheet_3.pdf]
