# Supplementary material for: A Plant-Specific TGS1 Homolog Influences Gametophyte Development in Sexual Tetraploid Paspalum notatum Ovules
Source: PubMed Central journal article supplement (PMC6895069; doi:10.3389/fpls.2019.01566), 2019-11-29
Supplement: DataSheet_1.pdf [file DataSheet_1.pdf]

## Supplementary Data Sheet 1

### PN\_TGS1\_LIKE EXPRESSION IN LEAVES

#### E1.1 vs WT (Q4188)

Relative Expression Results

Parameter Value

Iterations 2000

| Gene     | Type | Reaction Efficiency | Expression | Std. Error    | 95% C.I.      | P(H1) | Result |
|----------|------|---------------------|------------|---------------|---------------|-------|--------|
| TGS1     | TRG  | 0,7608              | 0,791      | 0,671 - 0,951 | 0,601 - 1,052 | 0,01  | DOWN   |
| Tubuline | REF  | 0,8692              | 1          |               |               |       |        |

#### Interpretation

TGS1 is DOWN-regulated in sample group (in comparison to control group) by a mean factor of 0,791 (S.E. range is 0,671 - 0,951).

TGS1 sample group is different to control group. P(H1)=0,005

#### E2.1 vs WT (Q4188)

Relative Expression Results

Parameter Value

Iterations 2000

| Gene     | Type | Reaction Efficiency | Expression | Std. Error    | 95% C.I.      | P(H1) | Result |
|----------|------|---------------------|------------|---------------|---------------|-------|--------|
| TGS1     | TRG  | 0,77                | 0,908      | 0,729 - 1,129 | 0,584 - 1,270 | 0,32  |        |
| Tubuline | REF  | 0,8408              | 1          |               |               |       |        |

#### Interpretation

TGS1 sample group is not different to control group. P(H1)=0,320

#### E2.3 vs WT (Q4188)

Relative Expression Results

Parameter Value

Iterations 2000

| Gene     | Type | Reaction Efficiency | Expression | Std. Error    | 95% C.I.      | P(H1) | Result |
|----------|------|---------------------|------------|---------------|---------------|-------|--------|
| TGS1     | TRG  | 0,7467              | 1,049      | 0,865 - 1,224 | 0,800 - 1,441 | 0,54  |        |
| Tubuline | REF  | 0,84                | 1          |               |               |       |        |

#### Interpretation

TGS1 sample group is not different to control group. P(H1)=0,535

#### E2.9 vs WT (Q4188)

Relative Expression Results

Parameter Value

Iterations 2000

| Gene | Type | Reaction Efficiency | Expression | Std. Error | 95% C.I. | P(H1) | Result |
|------|------|---------------------|------------|------------|----------|-------|--------|
|------|------|---------------------|------------|------------|----------|-------|--------|

|          |     |        |       |               |               |   |      |
|----------|-----|--------|-------|---------------|---------------|---|------|
| TGS1     | TRG | 0,7717 | 0,343 | 0,252 - 0,459 | 0,224 - 0,555 | 0 | DOWN |
| Tubuline | REF | 0,8633 | 1     |               |               |   |      |

### Interpretation

TGS1 is DOWN-regulated in sample group (in comparison to control group) by a mean factor of 0,343 (S.E. range is 0,252 - 0,459).

TGS1 sample group is different to control group. P(H1)=0,001

### E2.13 vs WT (Q4188)

Relative Expression Results

Parameter Value

Iterations 2000

| Gene     | Type | Reaction Efficiency | Expression | Std. Error    | 95% C.I.      | P(H1) | Result |
|----------|------|---------------------|------------|---------------|---------------|-------|--------|
| TGS1     | TRG  | 0,8242              | 0,365      | 0,280 - 0,505 | 0,237 - 0,675 | 0     | DOWN   |
| Tubuline | REF  | 0,8408              | 1          |               |               |       |        |

### Interpretation

TGS1 is DOWN-regulated in sample group (in comparison to control group) by a mean factor of 0,365 (S.E. range is 0,280 - 0,505).

TGS1 sample group is different to control group. P(H1)=0,000

### E2.14 vs WT (Q4188)

Relative Expression Results

Parameter Value

Iterations 2000

| Gene     | Type | Reaction Efficiency | Expression | Std. Error    | 95% C.I.      | P(H1) | Result |
|----------|------|---------------------|------------|---------------|---------------|-------|--------|
| TGS1     | TRG  | 0,7975              | 0,453      | 0,369 - 0,556 | 0,328 - 0,630 | 0     | DOWN   |
| Tubuline | REF  | 0,7967              | 1          |               |               |       |        |

TGS1 is DOWN-regulated in sample group (in comparison to control group) by a mean factor of 0,453 (S.E. range is 0,369 - 0,556).

TGS1 sample group is different to control group. P(H1)=0,000

## Supplementary Data Sheet 1

### PN\_TGS1\_LIKE EXPRESSION IN FLOWERS

#### E2.9 vs WT (Q4188)

Relative Expression Results

Parameter Value

Iterations 2000

| Gene     | Type | Reaction Efficiency | Expression | Std. Error    | 95% C.I.      | P(H1) | Result |
|----------|------|---------------------|------------|---------------|---------------|-------|--------|
| TGS1     | TRG  | 0,7558              | 0,51       | 0,362 - 0,678 | 0,235 - 0,752 | 0,002 | DOWN   |
| Tubuline | REF  | 0,7333              | 1          |               |               |       |        |

#### Interpretation

TGS1 is DOWN-regulated in sample group (in comparison to control group) by a mean factor of 0,510 (S.E. range is 0,362 - 0,678).

TGS1 sample group is different to control group. P(H1)=0,002

#### E2.13 vs WT (Q4188)

Relative Expression Results

Parameter Value

Iterations 2000

| Gene     | Type | Reaction Efficiency | Expression | Std. Error    | 95% C.I.      | P(H1) | Result |
|----------|------|---------------------|------------|---------------|---------------|-------|--------|
| TGS1     | TRG  | 0,8667              | 0,568      | 0,425 - 0,824 | 0,367 - 0,996 | 0     | DOWN   |
| Tubuline | REF  | 0,7475              | 1          |               |               |       |        |

#### Interpretation

TGS1 is DOWN-regulated in sample group (in comparison to control group) by a mean factor of 0,568 (S.E. range is 0,425 - 0,824).

TGS1 sample group is different to control group. P(H1)=0,000
