# Supplementary material for: A Plant-Specific TGS1 Homolog Influences Gametophyte Development in Sexual Tetraploid Paspalum notatum Ovules
Source: PubMed Central journal article supplement (PMC6895069; doi:10.3389/fpls.2019.01566), 2019-11-29
Supplement: DataSheet_2.pdf [file DataSheet_2.pdf]

## Supplementary Data Sheet 2

### Number of trichomes formed in transformed and control plants

| <b>Plant</b>        | <b>Total number of cm examined</b> | <b>Total number of trichomes scored</b> | <b>Trichomes/cm</b> | <b>SD<sup>a</sup></b> |
|---------------------|------------------------------------|-----------------------------------------|---------------------|-----------------------|
| WT (Q4188)(control) | 14                                 | 0                                       | 0                   | 0                     |
| E1.4 (control)      | 23                                 | 0                                       | 0                   | 0                     |
| E2.9 (antisense)    | 66                                 | 166                                     | 2.51                | 0.74                  |
| E2.13 (antisense)   | 28                                 | 79                                      | 2.8                 | 1.19                  |
| E2.14 (antisense)   | 33                                 | 181                                     | 5.48                | 1.44                  |

<sup>a</sup> Standard deviation

### Inflorescences number and morphology

| <b>Plant</b>      | <b>Number of inflorescences analyzed</b> | <b>Racemes per inflorescence (SD)<sup>a</sup></b> | <b>Number of spikelets per row (SD)<sup>a</sup></b> | <b>Raceme length (cm) (SD)<sup>a</sup></b> |
|-------------------|------------------------------------------|---------------------------------------------------|-----------------------------------------------------|--------------------------------------------|
| WT (Q4188)        | 12                                       | 2 (0)                                             | 48.5 (12.0)                                         | 13.7 (1.6)                                 |
| E1.4 (control)    | 8                                        | 2 (0)                                             | 42.1 (7.6)                                          | 12.23 (2.9)                                |
| E2.9 (antisense)  | 45                                       | 2.7 (0.5)                                         | 32.6 (7.1)                                          | 9.92 (2.0)                                 |
| E2.13 (antisense) | 6                                        | 2 (0)                                             | 33.5 (1.9)                                          | 10.41 (0.5)                                |

<sup>a</sup> Standard deviation

### Pollen viability analysis

| <b>Plant</b> | <b>Number of VP</b> | <b>Number of NVP</b> | <b>Total</b> | <b>%NVP (95% CI)</b>   |
|--------------|---------------------|----------------------|--------------|------------------------|
| WT           | 5191                | 3250                 | 8441         | 38.5 (37.5<P> 39.6)    |
| E1.4         | 4047                | 2080                 | 6127         | 34.0 (32.8<P> 35.2)    |
| E2.9         | 3519                | 2421                 | 5940         | 40.76 (39.51<P> 42.02) |
| E2.13        | 3464                | 2368                 | 5832         | 40.60 (39.34<P> 41.87) |

VP: viable pollen, NVP: non-viable pollen, % NVP: percentage of non-viable pollen
